# Supplementary material for: Mechanistic study of the cooperative palladium/Lewis acid-catalyzed transfer hydrocyanation reaction: the origin of the regioselectivity
Source: Royal Society of Chemistry journal article supplement (doi:10.1039/d0dt03941a), 2020-12-22
Supplement: d0dt03941a1.pdf [file d0dt03941a1.pdf]

## SUPPLEMENTARY INFORMATION

### Mechanistic Study of the Cooperative Palladium/Lewis Acid-Catalyzed Transfer Hydrocyanation Reaction: The Origin of the Regioselectivity

Dandan Jiang<sup>†a</sup>, Xiaojun Li<sup>†a</sup>, Jiali Cai<sup>a</sup>, Yuna Bai<sup>a</sup>, Lixiong Zhang<sup>b</sup>, Lili Zhao<sup>a\*</sup>

<sup>a</sup>Institute of Advanced Synthesis, School of Chemistry and Molecular Engineering, Nanjing Tech University, Nanjing 211816, China. Email: [ias\\_llzhao@njtech.edu.cn](mailto:ias_llzhao@njtech.edu.cn)

<sup>b</sup>College of Chemical Engineering, State Key Laboratory of Materials-Oriented Chemical Engineering, Nanjing Tech University, Nanjing 211816, China

#### Table of Contents

|                                                                    | Page |
|--------------------------------------------------------------------|------|
| Optimized geometries of the structure in Fig. 1                    | 2    |
| Optimized geometries of the structure in Fig. 2                    | 3    |
| Optimized geometries of the structure in Fig. 3                    | 3    |
| Optimized geometries of the structure in Table 1                   | 4    |
| Free energy profile for the stage I without Lewis acid Catalyzed   | 5    |
| Free energy profile for the stage II without Lewis acid Catalyzed  | 5    |
| Free energy profile for the stage III without Lewis acid Catalyzed | 6    |
| The calculated NBO 6.0 charge (q) of <b>IM5</b>                    | 7    |
| Coordinates and energies of the calculated structures              | 8    |

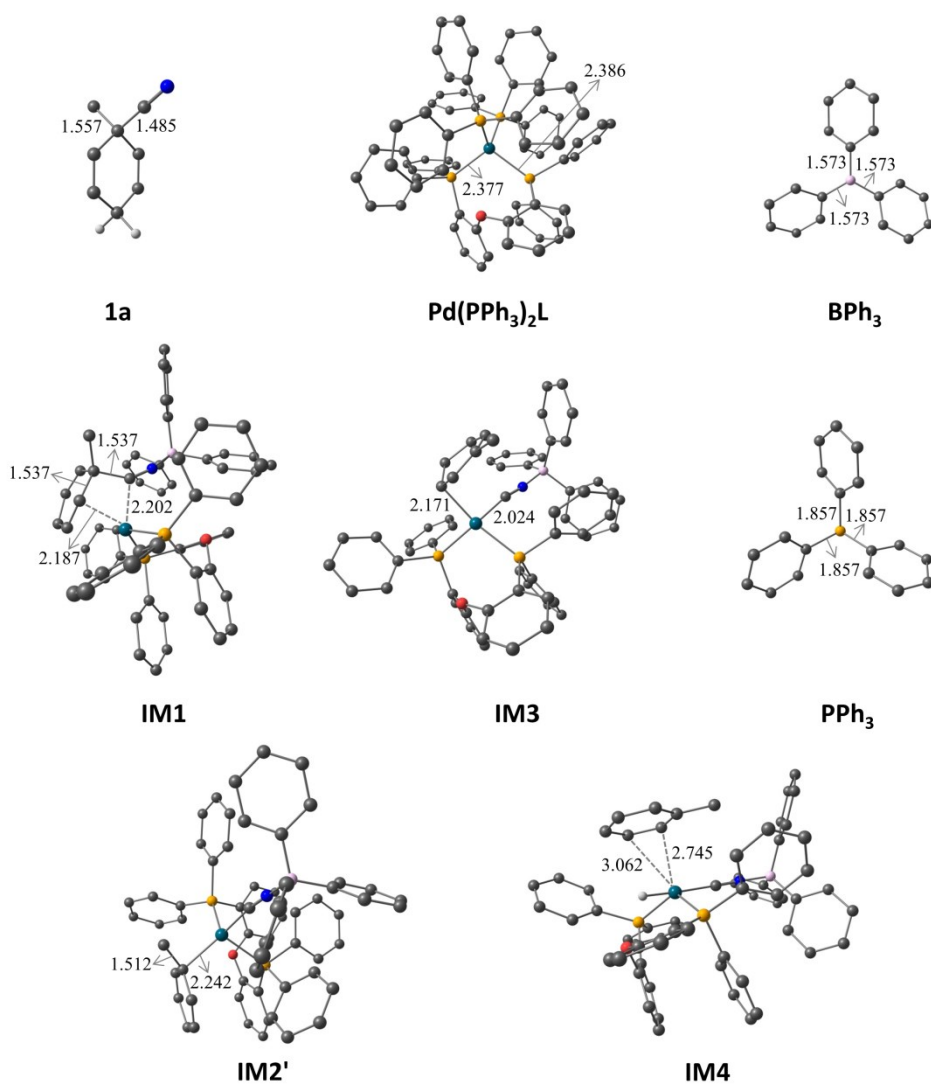

**Fig. S1** Optimized geometries according to the reaction pathway in Fig. 1. Key bond distances are given in Å. Some hydrogen atoms are omitted for clarity (color code, C: black, O: red, H: white, N: blue, P: orange, Pd: green, B: pink).

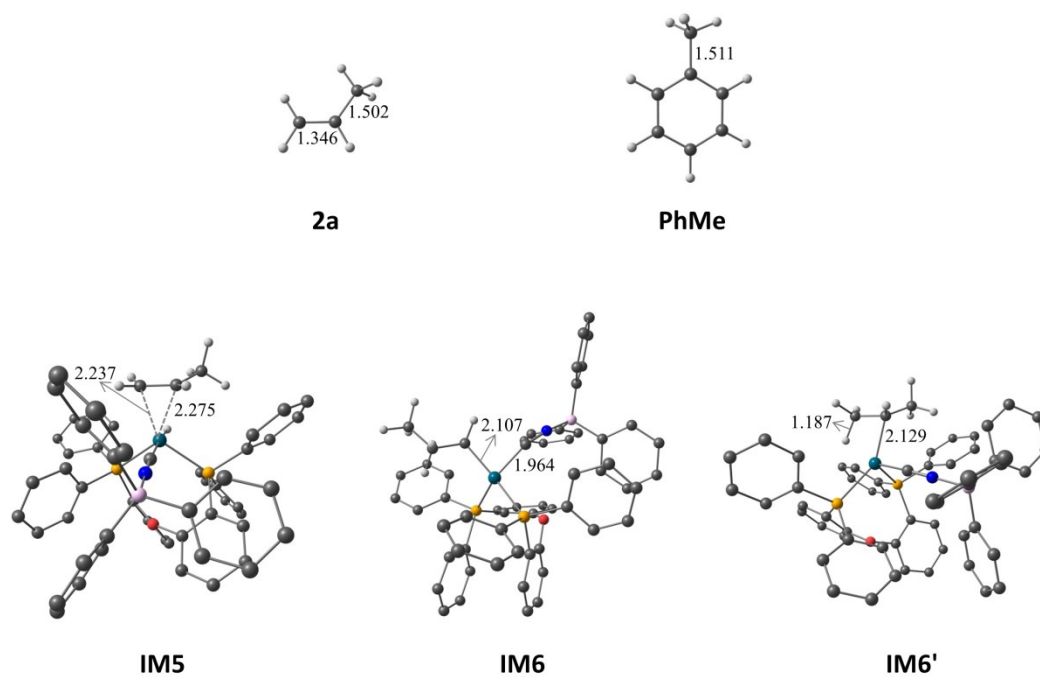

**Fig. S2** Optimized geometries according to the reaction pathway in Fig. 2. Key bond distances are given in Å. Some hydrogen atoms are omitted for clarity (color code, C: black, O: red, H: white, N: blue, P: orange, Pd: green, B: pink).

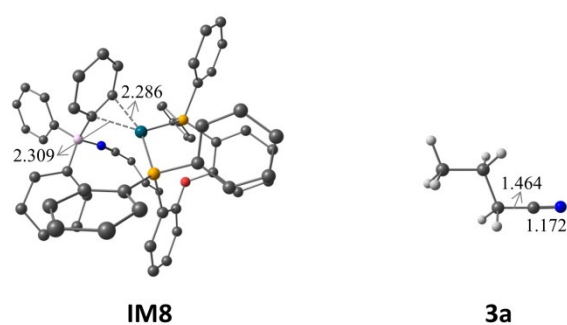

**Fig. S3** Optimized geometries according to the reaction pathway in Fig. 3. Key bond distances are given in Å. Some hydrogen atoms are omitted for clarity (color code, C: black, O: red, H: white, N: blue, P: orange, Pd: green, B: pink).

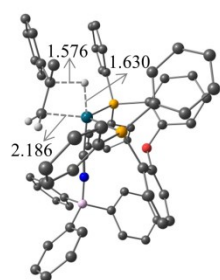

**TS3-b**

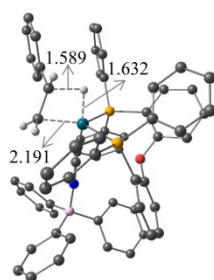

**TS3-c**

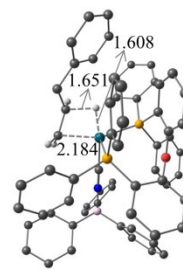

**TS3-d**

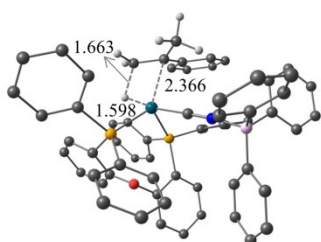

**TS3'-b**

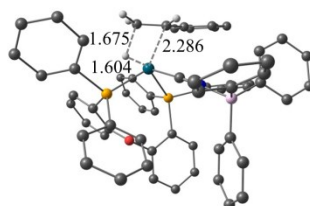

**TS3'-c**

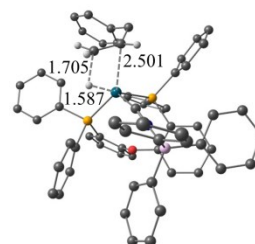

**TS3'-d**

**Fig. S4** Optimized geometries of the structure according to Table 1. Key bond distances are given in Å. Some hydrogen atoms are omitted for clarity (color code, C: black, O: red, H: white, N: blue, P: orange, Pd: green, B: pink).

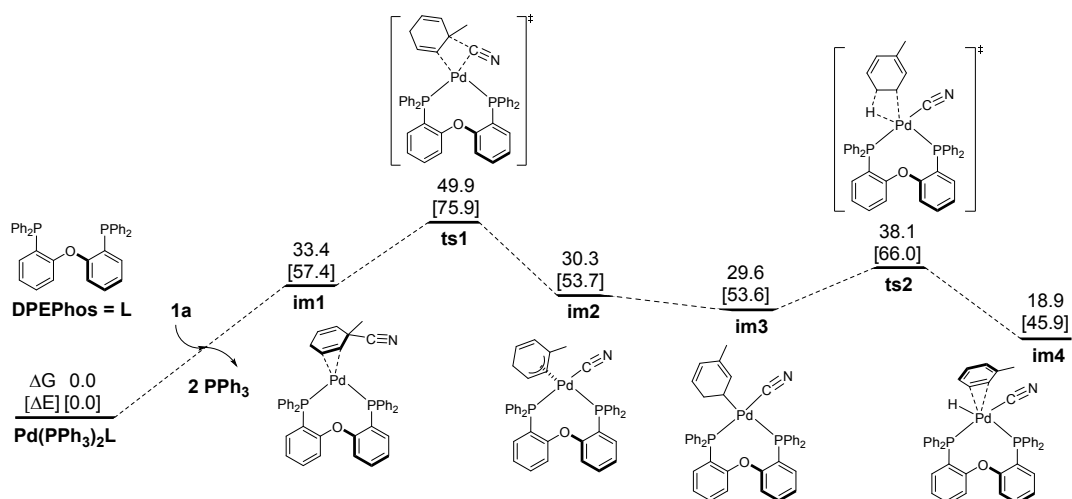

**Fig. S5** Computed free energy profile (in kcal mol<sup>-1</sup>) for the stage I without Lewis acid binding to the N atom of nitrile at the BP86+D3/def2-TZVPP (smd, solvent=1,4 Dioxane)//BP86+D3/def2-SVP (smd, solvent = 1,4-Dioxane) level.

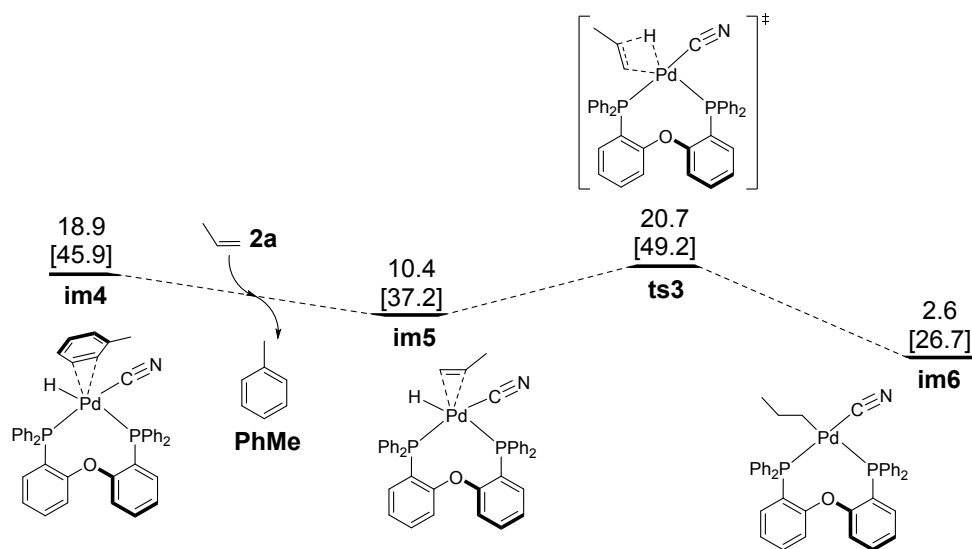

**Fig. S6** Computed free energy profile (in kcal mol<sup>-1</sup>) for the stage II without Lewis acid binding to the N atom of nitrile at the BP86+D3/def2-TZVPP (smd, solvent=1,4 Dioxane)//BP86+D3/def2-SVP (smd, solvent = 1,4-Dioxane) level.

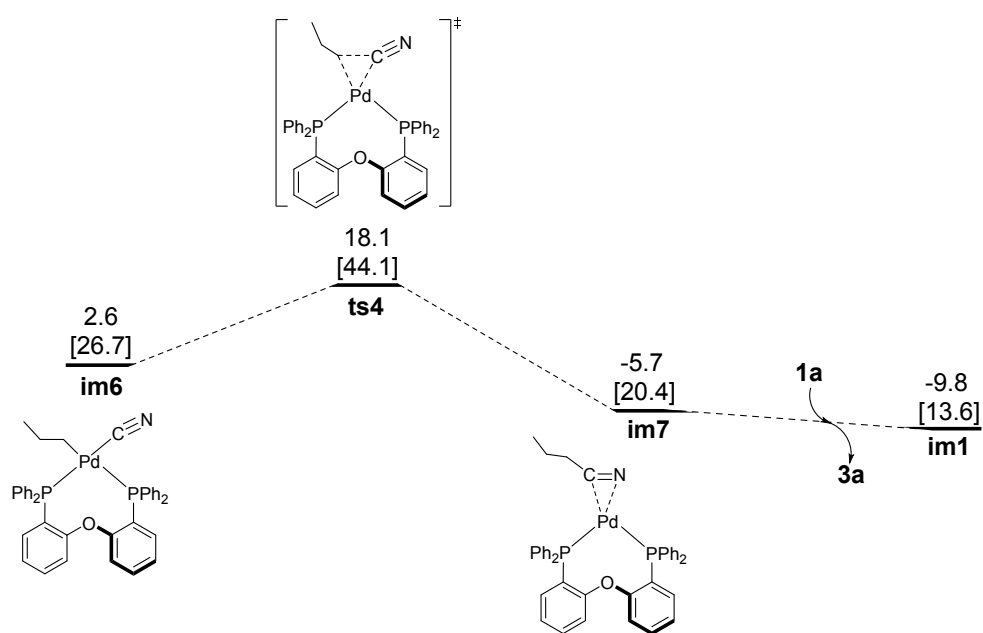

**Fig. S7** Computed free energy profile (in kcal mol<sup>-1</sup>) for the stage III without Lewis acid binding to the N atom of nitrile at the BP86+D3/def2-TZVPP (smd, solvent=1,4 Dioxane)//BP86+D3/def2-SVP (smd, solvent = 1,4-Dioxane) level.

**Table S1.** The calculated NBO 6.0 charge (q) of **IM5** at the BP86+D3/def2-TZVPP (smd, solvent=1,4 Dioxane)//BP86+D3/def2-SVP (smd, solvent = 1,4-Dioxane) level.

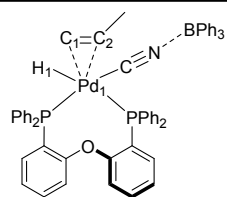

**IM5**

|                     |        |
|---------------------|--------|
| q(Pd <sub>1</sub> ) | 0.355  |
| q(H <sub>1</sub> )  | -0.085 |
| q(C <sub>1</sub> )  | -0.505 |
| q(C <sub>2</sub> )  | -0.252 |

**Table S2.** Coordinates and energies (in hatree) of the calculated structures at the bp86+D3/def2-tzvpp(smd,solvent=1,4-Dioxane)//bp86+D3/def2-svp(smd,solvent=1,4-Dioxane) level of theory.

|                                         |           |           |           |           |           |           |           |
|-----------------------------------------|-----------|-----------|-----------|-----------|-----------|-----------|-----------|
| <b>Pd(PPh<sub>3</sub>)<sub>2</sub>L</b> |           |           | C         | -2.975455 | -1.773224 | 3.670290  |           |
| Free Energy = -4347.872693              |           |           | C         | -1.541290 | 0.186288  | 3.607043  |           |
| Energy = -4348.82199                    |           |           | C         | -3.159402 | -1.586485 | 5.051432  |           |
| P                                       | -0.818339 | 2.057687  | -0.844040 | H         | -3.465260 | -2.619464 | 3.162649  |
| P                                       | -1.866630 | -1.077679 | 1.101301  | C         | -1.734224 | 0.383857  | 4.983252  |
| C                                       | -2.341548 | 2.820095  | -0.086448 | H         | -0.860000 | 0.843388  | 3.045984  |
| C                                       | -3.307031 | 3.590713  | -0.773819 | C         | -2.542635 | -0.506915 | 5.710438  |
| C                                       | -2.466878 | 2.685974  | 1.311127  | H         | -3.790453 | -2.290719 | 5.617723  |
| C                                       | -4.374881 | 4.183530  | -0.076769 | H         | -1.223048 | 1.216691  | 5.490685  |
| H                                       | -3.224556 | 3.746121  | -1.859969 | H         | -2.684226 | -0.367461 | 6.794335  |
| C                                       | -3.515768 | 3.298035  | 2.013815  | C         | -2.056526 | -2.927864 | 0.925678  |
| H                                       | -1.738201 | 2.064045  | 1.848258  | C         | -3.247741 | -3.573759 | 0.525835  |
| C                                       | -4.482454 | 4.043568  | 1.318377  | C         | -0.922626 | -3.723851 | 1.191189  |
| H                                       | -5.125006 | 4.769676  | -0.632019 | C         | -3.287196 | -4.971791 | 0.378064  |
| H                                       | -3.586915 | 3.166491  | 3.105454  | H         | -4.153317 | -2.985716 | 0.315191  |
| H                                       | -5.320017 | 4.512407  | 1.859449  | C         | -0.959083 | -5.119169 | 1.051966  |
| C                                       | 0.293208  | 3.563258  | -0.879496 | H         | 0.016506  | -3.236720 | 1.479581  |
| C                                       | 1.681474  | 3.348324  | -1.010177 | C         | -2.144936 | -5.750430 | 0.634578  |
| C                                       | -0.183840 | 4.889488  | -0.797442 | H         | -4.222637 | -5.455009 | 0.052331  |
| C                                       | 2.571773  | 4.430518  | -1.093407 | H         | -0.048264 | -5.707895 | 1.246282  |
| H                                       | 2.068996  | 2.322269  | -1.005733 | H         | -2.177554 | -6.844280 | 0.506511  |
| C                                       | 0.710570  | 5.972142  | -0.862850 | Pd        | -0.004038 | 0.023263  | 0.132021  |
| H                                       | -1.258844 | 5.089673  | -0.674804 | P         | 0.799582  | -1.408245 | -1.599751 |
| C                                       | 2.089576  | 5.748301  | -1.020096 | C         | 1.890267  | -0.622632 | -2.892723 |
| H                                       | 3.652161  | 4.236565  | -1.182885 | O         | 3.069952  | 0.500986  | -1.091971 |
| H                                       | 0.322668  | 7.001402  | -0.790592 | C         | 3.789784  | -0.351232 | -0.280520 |
| H                                       | 2.788321  | 6.599039  | -1.066443 | C         | 4.839000  | -1.141337 | -0.777901 |
| C                                       | -1.220324 | 1.959996  | -2.658553 | C         | 5.577857  | -1.937627 | 0.110828  |
| C                                       | -0.186589 | 2.102099  | -3.615437 | C         | 5.279531  | -1.925720 | 1.484539  |
| C                                       | -2.517142 | 1.628676  | -3.115233 | C         | 4.211230  | -1.148513 | 1.963169  |
| C                                       | -0.450743 | 1.935515  | -4.984983 | C         | 3.425134  | -0.366557 | 1.089203  |
| H                                       | 0.841603  | 2.333955  | -3.297076 | C         | 1.746229  | -0.786176 | -4.288592 |
| C                                       | -2.781891 | 1.481204  | -4.487126 | C         | 2.540022  | -0.065245 | -5.196220 |
| H                                       | -3.329668 | 1.468442  | -2.394203 | C         | 3.502355  | 0.845861  | -4.728232 |
| C                                       | -1.750961 | 1.633314  | -5.430945 | C         | 3.688254  | 1.006234  | -3.345179 |
| H                                       | 0.373455  | 2.042277  | -5.707651 | C         | 2.904508  | 0.263678  | -2.448831 |
| H                                       | -3.804265 | 1.233432  | -4.815660 | P         | 1.824943  | 0.446035  | 1.589643  |
| H                                       | -1.956158 | 1.510092  | -6.506300 | H         | 5.059592  | -1.133813 | -1.855781 |
| C                                       | -3.477780 | -0.508305 | 0.387314  | H         | 6.392319  | -2.569371 | -0.276870 |
| C                                       | -4.450710 | 0.205977  | 1.116168  | H         | 5.867564  | -2.538602 | 2.185426  |
| C                                       | -3.696166 | -0.758462 | -0.986606 | H         | 3.960001  | -1.170463 | 3.034639  |
| C                                       | -5.610374 | 0.678910  | 0.476188  | H         | 0.985719  | -1.479300 | -4.677587 |
| H                                       | -4.297329 | 0.409837  | 2.186412  | H         | 2.394827  | -0.210949 | -6.278263 |
| C                                       | -4.878649 | -0.332031 | -1.609202 | H         | 4.114333  | 1.427027  | -5.435731 |
| H                                       | -2.931510 | -1.288297 | -1.574395 | H         | 4.437664  | 1.701153  | -2.937829 |
| C                                       | -5.834841 | 0.403599  | -0.883598 | C         | 2.355627  | 2.197425  | 1.877919  |
| H                                       | -6.345015 | 1.265365  | 1.050615  | C         | 1.350926  | 3.152992  | 2.147798  |
| H                                       | -5.035959 | -0.556255 | -2.676635 | C         | 3.701320  | 2.615417  | 1.824799  |
| H                                       | -6.750567 | 0.764958  | -1.378362 | C         | 1.682968  | 4.496982  | 2.371344  |
| C                                       | -2.163599 | -0.884054 | 2.931960  | H         | 0.294671  | 2.841644  | 2.156120  |



|                            |           |           |           |                            |           |           |           |
|----------------------------|-----------|-----------|-----------|----------------------------|-----------|-----------|-----------|
| C                          | 4.032195  | 3.966562  | 2.031064  | C                          | 3.067091  | -1.347204 | 1.243547  |
| H                          | 4.496163  | 1.880878  | 1.619647  | H                          | 0.922749  | -1.679749 | 1.106331  |
| C                          | 3.026625  | 4.908965  | 2.306439  | C                          | 4.030313  | 0.160130  | -0.404874 |
| H                          | 0.884941  | 5.230921  | 2.563610  | H                          | 2.648734  | 0.988917  | -1.864741 |
| H                          | 5.086078  | 4.284271  | 1.974627  | C                          | 4.186225  | -0.684518 | 0.709625  |
| H                          | 3.287172  | 5.968695  | 2.456849  | H                          | 3.182315  | -2.010142 | 2.116375  |
| C                          | 1.680815  | -0.154948 | 3.348588  | H                          | 4.903254  | 0.680022  | -0.831566 |
| C                          | 1.112505  | -1.430309 | 3.559491  | H                          | 5.181676  | -0.828868 | 1.159369  |
| C                          | 2.041106  | 0.617386  | 4.474021  | C                          | -1.090369 | -1.251438 | -0.445904 |
| C                          | 0.914993  | -1.934359 | 4.851956  | C                          | -1.909292 | -0.971004 | 0.670254  |
| H                          | 0.780533  | -2.012919 | 2.688953  | C                          | -1.087304 | -2.560879 | -0.981483 |
| C                          | 1.824247  | 0.122587  | 5.773747  | C                          | -2.704139 | -1.981927 | 1.239772  |
| H                          | 2.487728  | 1.614548  | 4.338415  | H                          | -1.923499 | 0.042813  | 1.100724  |
| C                          | 1.263213  | -1.151771 | 5.967663  | C                          | -1.871234 | -3.571901 | -0.402210 |
| H                          | 0.449156  | -2.923193 | 4.986222  | H                          | -0.459526 | -2.790076 | -1.859323 |
| H                          | 2.097890  | 0.742557  | 6.643060  | C                          | -2.685074 | -3.283593 | 0.709032  |
| H                          | 1.085269  | -1.529572 | 6.987072  | H                          | -3.339986 | -1.749618 | 2.109510  |
| C                          | -0.538677 | -2.222056 | -2.584532 | H                          | -1.854237 | -4.588683 | -0.826735 |
| C                          | -0.969326 | -3.530557 | -2.263201 | H                          | -3.307762 | -4.073691 | 1.158428  |
| C                          | -1.280749 | -1.478757 | -3.532425 | H                          | -2.197757 | 1.780664  | -1.847950 |
| C                          | -2.115690 | -4.072664 | -2.868112 |                            |           |           |           |
| H                          | -0.420895 | -4.128320 | -1.520540 |                            |           |           |           |
| C                          | -2.410930 | -2.033933 | -4.152914 | <b>1a</b>                  |           |           |           |
| H                          | -0.981203 | -0.453323 | -3.782074 | Free Energy = -365.0053693 |           |           |           |
| C                          | -2.840076 | -3.331210 | -3.818040 | Energy = -365.1163173      |           |           |           |
| H                          | -2.442003 | -5.085714 | -2.585203 | C                          | -2.322449 | -0.000123 | -0.352550 |
| H                          | -2.965284 | -1.432185 | -4.890343 | C                          | -1.518795 | 1.255244  | -0.157084 |
| H                          | -3.737097 | -3.760584 | -4.292166 | C                          | -0.203147 | 1.265661  | 0.128355  |
| C                          | 1.877737  | -2.881374 | -1.201497 | C                          | 0.631552  | 0.000129  | 0.314981  |
| C                          | 2.397410  | -3.701858 | -2.227673 | C                          | -0.203105 | -1.265571 | 0.129040  |
| C                          | 2.196672  | -3.177853 | 0.134341  | C                          | -1.518752 | -1.255367 | -0.156406 |
| C                          | 3.210765  | -4.802161 | -1.913521 | H                          | -3.202262 | 0.000060  | 0.335143  |
| H                          | 2.162933  | -3.478694 | -3.280894 | H                          | -2.052535 | 2.216445  | -0.255356 |
| C                          | 3.014291  | -4.275139 | 0.453274  | H                          | 0.336526  | 2.218944  | 0.256448  |
| H                          | 1.826260  | -2.514102 | 0.926546  | H                          | 0.336615  | -2.218757 | 0.257650  |
| C                          | 3.520415  | -5.092555 | -0.570809 | H                          | -2.052454 | -2.216638 | -0.254178 |
| H                          | 3.608701  | -5.436696 | -2.721984 | H                          | -2.783131 | -0.000405 | -1.370267 |
| H                          | 3.265439  | -4.477924 | 1.506161  | C                          | 1.299426  | 0.000506  | 1.721330  |
| H                          | 4.164148  | -5.952769 | -0.326020 | H                          | 1.933969  | -0.898706 | 1.861238  |
|                            |           |           |           | H                          | 1.933758  | 0.899939  | 1.860795  |
|                            |           |           |           | H                          | 0.505255  | 0.000597  | 2.494520  |
|                            |           |           |           | C                          | 1.702076  | -0.000209 | -0.713564 |
|                            |           |           |           | N                          | 2.549060  | -0.000442 | -1.524372 |
| <b>PPh<sub>3</sub></b>     |           |           |           |                            |           |           |           |
| Free Energy = -1036.406218 |           |           |           |                            |           |           |           |
| Energy = -1036.625263      |           |           |           |                            |           |           |           |
| P                          | 0.000421  | -0.000197 | -1.278872 |                            |           |           |           |
| C                          | -0.538175 | 1.570350  | -0.446783 | <b>BPh<sub>3</sub></b>     |           |           |           |
| C                          | 0.120613  | 2.147169  | 0.661553  | Free Energy = -719.8687141 |           |           |           |
| C                          | -0.358146 | 3.341347  | 1.229758  | Energy = -720.0946511      |           |           |           |
| C                          | -1.502282 | 3.968221  | 0.705767  | C                          | 1.136610  | -1.088034 | 0.001809  |
| C                          | -2.165212 | 3.399813  | -0.397443 | C                          | 2.373765  | -0.864000 | -0.662194 |
| C                          | -1.680533 | 2.215608  | -0.975961 | C                          | 0.970948  | -2.335486 | 0.663807  |
| H                          | 1.011308  | 1.658637  | 1.087308  | C                          | 3.386043  | -1.836697 | -0.677903 |
| H                          | 0.166239  | 3.781876  | 2.093256  | H                          | 2.534290  | 0.090262  | -1.190270 |
| H                          | -1.876097 | 4.902598  | 1.154324  | C                          | 1.989355  | -3.301906 | 0.675381  |
| H                          | -3.060361 | 3.887215  | -0.816421 | H                          | 0.026327  | -2.541536 | 1.193471  |
| C                          | 1.629351  | -0.319337 | -0.446184 | C                          | 3.198028  | -3.056626 | -0.002240 |
| C                          | 1.794632  | -1.164312 | 0.673433  | H                          | 4.328987  | -1.643358 | -1.214736 |
| C                          | 2.762975  | 0.333647  | -0.984534 | H                          | 1.840824  | -4.253769 | 1.210801  |

|   |           |           |           |
|---|-----------|-----------|-----------|
| H | 3.995144  | -3.817873 | -0.003462 |
| C | -1.510900 | -0.441262 | 0.001417  |
| C | -2.506891 | 0.327145  | 0.664295  |
| C | -1.937531 | -1.623858 | -0.662920 |
| C | -3.853695 | -0.069507 | 0.676690  |
| H | -2.210552 | 1.247452  | 1.193932  |
| C | -3.286810 | -2.011679 | -0.678125 |
| H | -1.193143 | -2.241733 | -1.191491 |
| C | -4.247756 | -1.237752 | -0.001548 |
| H | -4.602619 | 0.536126  | 1.212498  |
| H | -3.592587 | -2.924355 | -1.215037 |
| H | -5.306013 | -1.545886 | -0.003009 |
| C | 0.372828  | 1.527457  | 0.002955  |
| C | -0.438473 | 2.487799  | -0.661306 |
| C | 1.536796  | 2.006624  | 0.664734  |
| C | -0.099859 | 3.850304  | -0.678330 |
| H | -1.346283 | 2.151383  | -1.188602 |
| C | 1.866279  | 3.371364  | 0.675817  |
| H | 2.187035  | 1.291292  | 1.194644  |
| C | 1.051257  | 4.296202  | -0.002900 |
| H | -0.737644 | 4.571036  | -1.215453 |
| H | 2.765187  | 3.717664  | 1.211353  |
| H | 1.313845  | 5.366699  | -0.005191 |
| B | -0.000552 | -0.000785 | 0.002783  |

### 2a

Free Energy = -117.8994845

Energy = -117.9513885

|   |           |           |           |
|---|-----------|-----------|-----------|
| C | 0.129013  | -0.453712 | 0.000025  |
| H | 0.158651  | -1.560923 | -0.000120 |
| C | 1.294709  | 0.219963  | 0.000133  |
| H | 2.264252  | -0.305894 | -0.000202 |
| H | 1.325592  | 1.324390  | -0.000481 |
| C | -1.239632 | 0.164734  | -0.000056 |
| H | -1.199048 | 1.273914  | -0.000146 |
| H | -1.827036 | -0.159023 | -0.888469 |
| H | -1.826946 | -0.158374 | 0.888803  |

### PhMe

Free Energy = -271.5761436

Energy = -271.6696876

|   |           |           |           |
|---|-----------|-----------|-----------|
| C | -0.923968 | 0.007955  | -0.008034 |
| C | -0.202461 | -1.208106 | -0.005300 |
| C | 1.201857  | -1.217684 | 0.001233  |
| C | 1.918008  | -0.006412 | 0.004722  |
| C | 1.215153  | 1.210338  | 0.001366  |
| C | -0.191408 | 1.214796  | -0.005262 |
| H | -0.754933 | -2.162950 | -0.008766 |
| H | 1.742626  | -2.178111 | 0.001694  |
| H | 3.019816  | -0.012329 | 0.008095  |
| H | 1.764511  | 2.165822  | 0.001960  |
| H | -0.733487 | 2.175282  | -0.009261 |
| C | -2.435365 | 0.003451  | 0.005104  |
| H | -2.826210 | -0.345491 | 0.986398  |
| H | -2.854100 | 1.013675  | -0.178177 |
| H | -2.849123 | -0.681929 | -0.764919 |

### 3a

Free Energy = -211.3975666

Energy = -211.4678536

|   |           |           |           |
|---|-----------|-----------|-----------|
| C | 1.543070  | 0.126100  | -0.000217 |
| N | 2.639840  | -0.287003 | 0.000130  |
| C | 0.160794  | 0.609726  | 0.000021  |
| C | -0.887010 | -0.528683 | -0.000053 |
| H | -0.719167 | -1.173183 | 0.889431  |
| H | 0.023976  | 1.262695  | 0.890577  |
| H | 0.024007  | 1.263001  | -0.890321 |
| H | -0.719183 | -1.173321 | -0.889467 |
| C | -2.317142 | 0.017292  | 0.000026  |
| H | -3.059915 | -0.806792 | -0.000835 |
| H | -2.513598 | 0.644233  | 0.896128  |
| H | -2.513274 | 0.645777  | -0.895088 |

### IM1

Free Energy = -3359.896622

Energy = -3360.736515

|    |           |           |           |
|----|-----------|-----------|-----------|
| C  | 0.425787  | 2.045069  | -3.885383 |
| C  | 1.128584  | 0.755901  | -3.516478 |
| C  | 0.461483  | -0.461254 | -3.341000 |
| C  | -1.048594 | -0.460930 | -3.054108 |
| C  | -1.735565 | 0.813537  | -3.532173 |
| C  | -1.069511 | 1.930452  | -3.884997 |
| H  | 0.734213  | 2.895510  | -3.236635 |
| H  | 2.201856  | 0.713278  | -3.776915 |
| H  | 0.938296  | -1.427135 | -3.577280 |
| H  | -2.837038 | 0.790705  | -3.524603 |
| H  | -1.642189 | 2.821011  | -4.194787 |
| H  | 0.762857  | 2.351676  | -4.906592 |
| C  | -1.757089 | -1.710773 | -3.603507 |
| H  | -2.825853 | -1.729799 | -3.311284 |
| H  | -1.685875 | -1.700860 | -4.710946 |
| H  | -1.280189 | -2.641640 | -3.235806 |
| C  | -1.186286 | -0.411869 | -1.523832 |
| N  | -1.973266 | -0.442832 | -0.625846 |
| P  | 1.184800  | 1.933149  | 0.148095  |
| C  | 0.302187  | 1.986321  | 1.775365  |
| O  | 0.760481  | -0.380213 | 2.085048  |
| C  | 2.119941  | -0.554823 | 2.237768  |
| C  | 2.852698  | 0.063691  | 3.265200  |
| C  | 4.231628  | -0.178695 | 3.369369  |
| C  | 4.872966  | -1.041094 | 2.463488  |
| C  | 4.136040  | -1.641625 | 1.429416  |
| C  | 2.754190  | -1.395814 | 1.288356  |
| C  | -0.273711 | 3.168285  | 2.292365  |
| C  | -0.952980 | 3.163739  | 3.521449  |
| C  | -1.101273 | 1.963207  | 4.237575  |
| C  | -0.533118 | 0.777714  | 3.745880  |
| C  | 0.182061  | 0.800380  | 2.539942  |
| P  | 1.776867  | -1.868835 | -0.201872 |
| Pd | 0.945399  | 0.080771  | -1.278023 |
| H  | 2.342366  | 0.742749  | 3.963735  |
| H  | 4.807565  | 0.318079  | 4.165650  |







|   |           |           |           |    |           |           |           |
|---|-----------|-----------|-----------|----|-----------|-----------|-----------|
| H | -3.624505 | -2.925530 | -3.724674 | Pd | 0.719276  | 0.009024  | -1.081694 |
| H | -7.246140 | -0.522322 | -3.684540 | H  | 3.574242  | -1.466952 | 3.287831  |
| H | -5.909738 | -2.417569 | -4.659455 | H  | 3.185101  | 0.033848  | 5.258338  |
| C | -4.315969 | -0.136455 | 1.023686  | H  | 2.479697  | 2.423731  | 4.898247  |
| C | -5.407970 | -1.027760 | 1.129205  | H  | 2.082503  | 3.266907  | 2.586556  |
| C | -3.586204 | 0.123156  | 2.209189  | H  | 1.216781  | -4.773569 | 0.482175  |
| C | -5.744089 | -1.645913 | 2.349888  | H  | 3.376229  | -5.973859 | 0.807549  |
| H | -5.998388 | -1.261138 | 0.227253  | H  | 5.512443  | -4.675293 | 1.097926  |
| C | -3.892984 | -0.504507 | 3.427931  | H  | 5.446835  | -2.147189 | 1.073406  |
| H | -2.737139 | 0.824361  | 2.168950  | C  | 3.719251  | 2.371756  | -0.902290 |
| C | -4.978226 | -1.397921 | 3.503054  | C  | 3.654393  | 3.061564  | -2.137278 |
| H | -6.600263 | -2.340008 | 2.396489  | C  | 4.978425  | 1.971408  | -0.405229 |
| H | -3.276639 | -0.302665 | 4.319667  | C  | 4.823928  | 3.330364  | -2.864373 |
| H | -5.225583 | -1.896048 | 4.454997  | H  | 2.678432  | 3.396880  | -2.526082 |
| C | -4.328756 | 2.163156  | -0.427184 | C  | 6.146474  | 2.233960  | -1.142709 |
| C | -3.636104 | 3.100346  | -1.232235 | H  | 5.049632  | 1.445295  | 0.558693  |
| C | -5.437296 | 2.647533  | 0.306273  | C  | 6.074177  | 2.906492  | -2.374838 |
| C | -4.021096 | 4.451342  | -1.300953 | H  | 4.759054  | 3.871908  | -3.821675 |
| H | -2.765372 | 2.763822  | -1.821581 | H  | 7.123012  | 1.912314  | -0.746228 |
| C | -5.838935 | 3.995492  | 0.241201  | H  | 6.991111  | 3.108174  | -2.950861 |
| H | -5.996312 | 1.950055  | 0.953174  | C  | 1.310171  | 3.520847  | 0.164739  |
| C | -5.128699 | 4.906508  | -0.560848 | C  | -0.099828 | 3.578465  | 0.219036  |
| H | -3.453621 | 5.153726  | -1.934524 | C  | 2.055572  | 4.710441  | 0.344737  |
| H | -6.708353 | 4.338992  | 0.826842  | C  | -0.755654 | 4.798771  | 0.457609  |
| H | -5.435845 | 5.964277  | -0.609988 | H  | -0.697111 | 2.667789  | 0.060969  |
| C | 3.866070  | -3.185200 | -2.503848 | C  | 1.397297  | 5.929413  | 0.575894  |
| C | 4.351769  | -1.788712 | -2.254553 | H  | 3.156038  | 4.680521  | 0.306729  |
| C | 3.547385  | -0.697155 | -2.346844 | C  | -0.008351 | 5.975739  | 0.634815  |
| C | 2.115790  | -0.787180 | -2.644642 | H  | -1.856717 | 4.820861  | 0.484807  |
| C | 1.622954  | -2.144171 | -2.946354 | H  | 1.987133  | 6.850161  | 0.712811  |
| C | 2.414382  | -3.247462 | -2.875095 | H  | -0.522397 | 6.933777  | 0.813670  |
| H | 4.484460  | -3.669092 | -3.301187 | C  | -0.814440 | -2.970869 | -0.008410 |
| H | 5.418955  | -1.652694 | -2.012078 | C  | -2.051331 | -2.816770 | 0.660029  |
| H | 3.974916  | 0.303582  | -2.200523 | C  | -0.717002 | -3.899633 | -1.072742 |
| H | 0.568864  | -2.240911 | -3.258286 | C  | -3.161323 | -3.587748 | 0.277327  |
| H | 1.994932  | -4.237528 | -3.123167 | H  | -2.170766 | -2.077337 | 1.465540  |
| H | 4.063054  | -3.827402 | -1.609561 | C  | -1.830609 | -4.669132 | -1.444453 |
| C | 1.463497  | 0.349910  | -3.397297 | H  | 0.232299  | -4.019801 | -1.610868 |
| H | 0.558987  | 0.828924  | -2.856336 | C  | -3.056251 | -4.515432 | -0.771265 |
| H | 2.161777  | 1.187523  | -3.584536 | H  | -4.117930 | -3.433489 | 0.797700  |
| H | 1.006387  | 0.013460  | -4.350934 | H  | -1.739618 | -5.390738 | -2.272166 |
| C | -1.174774 | 0.480860  | -0.591866 | H  | -3.933752 | -5.107034 | -1.075364 |
| N | -2.342682 | 0.545954  | -0.455707 | C  | 0.198113  | -1.322172 | 2.121349  |
| P | 0.554755  | -1.800006 | 0.365379  | C  | 0.247932  | -2.326676 | 3.115222  |
| C | 2.097375  | -2.784598 | 0.585546  | C  | -0.123465 | -0.002143 | 2.488245  |
| O | 3.314100  | -0.685880 | 0.712741  | C  | -0.020996 | -2.009497 | 4.454626  |
| C | 3.079337  | 0.075926  | 1.841490  | H  | 0.495671  | -3.364073 | 2.839550  |
| C | 3.273124  | -0.419486 | 3.141780  | C  | -0.380530 | 0.313728  | 3.832790  |
| C | 3.051170  | 0.426744  | 4.238529  | H  | -0.165808 | 0.788457  | 1.728008  |
| C | 2.652544  | 1.759475  | 4.037718  | C  | -0.333749 | -0.686191 | 4.816650  |
| C | 2.439047  | 2.236283  | 2.734794  | H  | 0.013766  | -2.800555 | 5.220496  |
| C | 2.633485  | 1.402544  | 1.612689  | H  | -0.621604 | 1.352322  | 4.105803  |
| C | 2.146232  | -4.196758 | 0.602129  | H  | -0.540398 | -0.435396 | 5.869222  |
| C | 3.362188  | -4.872995 | 0.790738  |    |           |           |           |
| C | 4.556417  | -4.147356 | 0.957030  |    |           |           |           |
| C | 4.530810  | -2.742959 | 0.948003  |    |           |           |           |
| C | 3.311749  | -2.071749 | 0.768539  |    |           |           |           |
| P | 2.130912  | 1.882622  | -0.104130 |    |           |           |           |

**IM3**

Free Energy = -3359.913389

Energy = -3360.749703

|   |           |           |           |    |           |           |           |
|---|-----------|-----------|-----------|----|-----------|-----------|-----------|
| B | 3.703862  | -0.602519 | 0.433732  | C  | -3.525003 | -0.546850 | 2.753374  |
| C | 4.492739  | -0.512120 | -1.005330 | C  | -3.473730 | -0.199120 | 1.386280  |
| C | 4.305503  | 0.637809  | -1.810889 | C  | -1.703073 | 4.401668  | -1.113559 |
| C | 5.266008  | -1.559040 | -1.552466 | C  | -2.694781 | 5.267277  | -1.604522 |
| C | 4.860020  | 0.746987  | -3.095841 | C  | -4.032803 | 4.842028  | -1.674603 |
| H | 3.688825  | 1.460871  | -1.420368 | C  | -4.380368 | 3.555872  | -1.230964 |
| C | 5.824128  | -1.467554 | -2.844395 | C  | -3.385308 | 2.705564  | -0.725651 |
| H | 5.427260  | -2.476107 | -0.960242 | P  | -2.750690 | -1.303527 | 0.092174  |
| C | 5.623111  | -0.313893 | -3.623129 | Pd | -0.829268 | -0.397647 | -0.899233 |
| H | 4.688410  | 1.659182  | -3.692374 | H  | -4.255349 | 3.148114  | 1.691979  |
| H | 6.418089  | -2.305492 | -3.246838 | H  | -4.303955 | 2.504665  | 4.119247  |
| H | 6.057539  | -0.241793 | -4.633989 | H  | -3.848107 | 0.123653  | 4.792741  |
| C | 3.953539  | 0.687849  | 1.412691  | H  | -3.280830 | -1.573550 | 3.063066  |
| C | 5.063609  | 1.553987  | 1.298201  | H  | -0.655526 | 4.738193  | -1.085330 |
| C | 3.011040  | 0.987746  | 2.426263  | H  | -2.415822 | 6.278090  | -1.940663 |
| C | 5.217010  | 2.675666  | 2.137558  | H  | -4.810943 | 5.513487  | -2.070297 |
| H | 5.817692  | 1.358099  | 0.517166  | H  | -5.418800 | 3.193373  | -1.261726 |
| C | 3.139427  | 2.109990  | 3.260421  | C  | -4.166695 | -1.955781 | -0.899644 |
| H | 2.134405  | 0.331186  | 2.550489  | C  | -4.053192 | -3.227253 | -1.514608 |
| C | 4.248324  | 2.966572  | 3.115164  | C  | -5.317927 | -1.176568 | -1.153140 |
| H | 6.093580  | 3.334821  | 2.018029  | C  | -5.065510 | -3.701583 | -2.365263 |
| H | 2.362972  | 2.323858  | 4.014103  | H  | -3.182333 | -3.868193 | -1.305652 |
| H | 4.357596  | 3.853104  | 3.761571  | C  | -6.328454 | -1.658577 | -2.001626 |
| C | 3.974468  | -2.013740 | 1.208508  | H  | -5.427964 | -0.185483 | -0.691649 |
| C | 3.092185  | -3.118192 | 1.145511  | C  | -6.205640 | -2.918306 | -2.614247 |
| C | 5.174479  | -2.196376 | 1.938148  | H  | -4.962251 | -4.694809 | -2.830774 |
| C | 3.387547  | -4.344580 | 1.772289  | H  | -7.223119 | -1.041542 | -2.182977 |
| H | 2.146886  | -3.019627 | 0.585183  | H  | -7.000066 | -3.291358 | -3.279951 |
| C | 5.483670  | -3.415352 | 2.566859  | C  | -2.234201 | -2.777251 | 1.095189  |
| H | 5.883161  | -1.353688 | 2.015600  | C  | -0.878024 | -2.907293 | 1.467019  |
| C | 4.588322  | -4.498785 | 2.487754  | C  | -3.170303 | -3.728456 | 1.563646  |
| H | 2.679423  | -5.187416 | 1.695188  | C  | -0.462259 | -3.963706 | 2.295496  |
| H | 6.427806  | -3.522449 | 3.127107  | H  | -0.140886 | -2.173832 | 1.101754  |
| H | 4.826043  | -5.456116 | 2.980214  | C  | -2.750380 | -4.789334 | 2.383370  |
| C | 0.353665  | -3.099346 | -2.057809 | H  | -4.234020 | -3.636162 | 1.293337  |
| C | -0.745856 | -2.074178 | -2.275325 | C  | -1.397237 | -4.908343 | 2.752118  |
| C | -0.532283 | -1.094193 | -3.333673 | H  | 0.599620  | -4.041522 | 2.577461  |
| C | 0.741512  | -0.818955 | -3.824481 | H  | -3.487973 | -5.525196 | 2.741835  |
| C | 1.879651  | -1.545743 | -3.285254 | H  | -1.072314 | -5.739897 | 3.397738  |
| C | 1.717493  | -2.586713 | -2.417600 | C  | 0.799471  | 2.688638  | -0.741956 |
| H | 0.330689  | -3.505819 | -1.023960 | C  | 1.780352  | 3.242714  | 0.103252  |
| H | -1.403859 | -0.564876 | -3.757686 | C  | 0.977589  | 2.734818  | -2.144560 |
| H | 2.895570  | -1.216479 | -3.558406 | C  | 2.911899  | 3.869136  | -0.452097 |
| H | 2.604040  | -3.093704 | -2.003269 | H  | 1.683826  | 3.177448  | 1.196353  |
| H | 0.141417  | -3.988001 | -2.711545 | C  | 2.094716  | 3.381314  | -2.692610 |
| C | 1.001064  | 0.246672  | -4.850981 | H  | 0.228665  | 2.269305  | -2.806299 |
| H | 1.470356  | -0.181586 | -5.764485 | C  | 3.062910  | 3.955705  | -1.845693 |
| H | 0.077870  | 0.780791  | -5.153085 | H  | 3.682953  | 4.272493  | 0.221474  |
| H | 1.729545  | 0.988439  | -4.454665 | H  | 2.218627  | 3.426139  | -3.786199 |
| C | 1.143901  | -0.537731 | -0.471006 | H  | 3.951323  | 4.444468  | -2.275523 |
| N | 2.216251  | -0.548728 | 0.014761  | C  | -0.677718 | 2.094048  | 1.709002  |
| P | -0.737205 | 1.874997  | -0.121290 | C  | -0.805091 | 3.367816  | 2.306477  |
| C | -2.025616 | 3.098703  | -0.669014 | C  | -0.480067 | 0.960159  | 2.522202  |
| O | -3.756132 | 1.431753  | -0.321627 | C  | -0.724133 | 3.501319  | 3.700944  |
| C | -3.766584 | 1.138078  | 1.032017  | H  | -0.969056 | 4.257642  | 1.678068  |
| C | -4.064316 | 2.109898  | 2.001115  | C  | -0.404657 | 1.097153  | 3.918142  |
| C | -4.090052 | 1.741836  | 3.354783  | H  | -0.389360 | -0.033429 | 2.058483  |
| C | -3.834170 | 0.412429  | 3.730757  | C  | -0.522967 | 2.366059  | 4.508835  |

|   |           |           |           |   |           |           |          |
|---|-----------|-----------|-----------|---|-----------|-----------|----------|
| H | -0.820001 | 4.497565  | 4.161306  | H | -1.852928 | 4.112134  | 4.283004 |
| H | -0.249888 | 0.203924  | 4.542845  | C | 1.224450  | 0.513688  | 0.660095 |
| H | -0.461293 | 2.472597  | 5.603550  | N | 2.380375  | 0.472103  | 0.436617 |
| H | -1.755435 | -2.517568 | -2.274129 | P | -1.110270 | -2.105821 | 0.030481 |

**TS2**

Free Energy = -3359.901864

Energy = -3360.731102

|   |           |           |           |    |           |           |           |
|---|-----------|-----------|-----------|----|-----------|-----------|-----------|
| B | 3.891563  | 0.421441  | 0.085963  | C  | -3.008879 | 0.192980  | -4.303805 |
| C | 4.691784  | 0.218394  | 1.498416  | C  | -2.530030 | 1.033465  | -3.287517 |
| C | 4.206788  | -0.690372 | 2.472276  | C  | -2.735475 | 0.724223  | -1.924832 |
| C | 5.920483  | 0.859855  | 1.773245  | C  | -3.009540 | -4.200988 | 0.682934  |
| C | 4.909179  | -0.946009 | 3.662435  | C  | -4.307767 | -4.651695 | 0.975957  |
| H | 3.255878  | -1.220431 | 2.285308  | C  | -5.401471 | -3.773862 | 0.871293  |
| C | 6.635816  | 0.610745  | 2.960938  | C  | -5.198324 | -2.451478 | 0.443117  |
| H | 6.327359  | 1.574168  | 1.037115  | C  | -3.901384 | -2.014974 | 0.134308  |
| C | 6.131647  | -0.293172 | 3.912545  | P  | -1.839343 | 1.623363  | -0.576737 |
| H | 4.504441  | -1.661279 | 4.398756  | Pd | -0.713325 | 0.165515  | 0.943409  |
| H | 7.592021  | 1.128845  | 3.146169  | H  | -4.484420 | -2.218959 | -2.352347 |
| H | 6.687788  | -0.488427 | 4.844508  | H  | -4.050384 | -1.667011 | -4.758405 |
| C | 4.094800  | -0.872190 | -0.904037 | H  | -2.816675 | 0.445448  | -5.357704 |
| C | 5.120050  | -1.827351 | -0.717131 | H  | -1.947456 | 1.927734  | -3.554936 |
| C | 3.228704  | -1.074493 | -2.006370 | H  | -2.160409 | -4.895755 | 0.774698  |
| C | 5.263097  | -2.938838 | -1.570986 | H  | -4.464375 | -5.695843 | 1.289050  |
| H | 5.815913  | -1.704972 | 0.129515  | H  | -6.418785 | -4.120323 | 1.111511  |
| C | 3.347418  | -2.186012 | -2.857847 | H  | -6.033932 | -1.744667 | 0.329524  |
| H | 2.424495  | -0.343197 | -2.192593 | C  | -3.093008 | 2.718804  | 0.202443  |
| C | 4.368851  | -3.129598 | -2.639238 | C  | -2.628165 | 3.782731  | 1.010066  |
| H | 6.071402  | -3.667931 | -1.392400 | C  | -4.479974 | 2.494465  | 0.079582  |
| H | 2.632006  | -2.325645 | -3.684640 | C  | -3.542328 | 4.630543  | 1.653264  |
| H | 4.467136  | -4.007121 | -3.299279 | H  | -1.545204 | 3.952490  | 1.122908  |
| C | 4.229698  | 1.843080  | -0.659399 | C  | -5.390141 | 3.327476  | 0.754518  |
| C | 4.938546  | 1.921033  | -1.880478 | H  | -4.855145 | 1.670268  | -0.545093 |
| C | 3.811369  | 3.068436  | -0.083081 | C  | -4.925634 | 4.400404  | 1.535303  |
| C | 5.217124  | 3.156362  | -2.499895 | H  | -3.171798 | 5.470389  | 2.261378  |
| H | 5.276880  | 0.988898  | -2.363589 | H  | -6.472008 | 3.143714  | 0.655469  |
| C | 4.080354  | 4.306963  | -0.689380 | H  | -5.641755 | 5.060011  | 2.050663  |
| H | 3.246384  | 3.045518  | 0.864898  | C  | -0.781471 | 2.804878  | -1.530287 |
| C | 4.787027  | 4.356277  | -1.906349 | C  | 0.542097  | 2.431892  | -1.847863 |
| H | 5.771427  | 3.180805  | -3.453316 | C  | -1.275118 | 4.046946  | -1.992500 |
| H | 3.730500  | 5.240250  | -0.217394 | C  | 1.367743  | 3.282135  | -2.600440 |
| H | 4.998452  | 5.324616  | -2.389346 | H  | 0.950350  | 1.480315  | -1.482276 |
| C | -1.106423 | -0.612731 | 3.331346  | C  | -0.446120 | 4.898902  | -2.742340 |
| C | -2.320765 | -0.053681 | 2.745563  | H  | -2.309322 | 4.351080  | -1.768048 |
| C | -2.759075 | 1.230377  | 3.161709  | C  | 0.875237  | 4.520811  | -3.044672 |
| C | -2.076285 | 1.958706  | 4.148398  | H  | 2.406066  | 2.981495  | -2.810676 |
| C | -0.924207 | 1.374765  | 4.761522  | H  | -0.837139 | 5.868638  | -3.090312 |
| C | -0.463910 | 0.121428  | 4.398470  | H  | 1.528057  | 5.197195  | -3.619026 |
| H | -1.006132 | -1.713667 | 3.346265  | C  | 0.126526  | -3.200187 | 0.840858  |
| H | -3.014869 | -0.710880 | 2.201610  | C  | 1.433819  | -3.202600 | 0.297668  |
| H | -3.683826 | 1.639438  | 2.726724  | C  | -0.086985 | -3.781980 | 2.114406  |
| H | -0.408437 | 1.930959  | 5.561753  | C  | 2.500803  | -3.768216 | 1.012994  |
| H | 0.416966  | -0.321300 | 4.888617  | H  | 1.637423  | -2.735967 | -0.678510 |
| H | -0.125866 | -0.572700 | 2.295320  | C  | 0.985144  | -4.354598 | 2.821298  |
| C | -2.552923 | 3.311949  | 4.609508  | H  | -1.092044 | -3.789747 | 2.565591  |
| H | -3.554684 | 3.555767  | 4.207588  | C  | 2.282071  | -4.343749 | 2.277622  |
| H | -2.596473 | 3.363048  | 5.718770  | H  | 3.509719  | -3.733817 | 0.574344  |



|   |           |           |           |   |           |           |           |
|---|-----------|-----------|-----------|---|-----------|-----------|-----------|
| H | 0.802508  | -4.808210 | 3.809002  | H | 3.867678  | 0.258385  | -3.942686 |
| H | 3.123357  | -4.778079 | 2.840301  | H | 2.043196  | 1.896936  | -3.439837 |
| C | -0.800924 | -2.352717 | -1.773998 | H | -0.334743 | 1.142088  | -3.281518 |
| C | -1.140575 | -3.560080 | -2.423542 | H | 0.901041  | -2.916102 | -4.190272 |
| C | -0.219526 | -1.306528 | -2.514372 | H | 3.277807  | -2.164043 | -4.335940 |
| C | -0.904871 | -3.707394 | -3.799046 | H | 2.310339  | -0.424385 | -1.043417 |
| H | -1.597554 | -4.384864 | -1.854041 | C | -1.322813 | -1.389735 | -3.550500 |
| C | 0.010150  | -1.453364 | -3.892398 | H | -1.511037 | -2.368705 | -4.032864 |
| H | 0.044899  | -0.368844 | -2.007052 | H | -1.608759 | -1.489839 | -2.483471 |
| C | -0.332570 | -2.653202 | -4.536619 | H | -2.016710 | -0.643405 | -3.986747 |
| H | -1.171652 | -4.651101 | -4.301256 | C | -1.090747 | 0.558415  | -0.463174 |
| H | 0.456684  | -0.621449 | -4.458787 | N | -2.252777 | 0.661786  | -0.306326 |
| H | -0.154940 | -2.769816 | -5.617599 | P | 0.684920  | -1.974314 | 0.318673  |

#### IM4

Free Energy = -3359.927016

Energy = -3360.760172

|   |           |           |           |    |           |           |           |
|---|-----------|-----------|-----------|----|-----------|-----------|-----------|
| B | -3.787544 | 0.785621  | -0.060947 | C  | 2.975675  | 1.156193  | 4.091602  |
| C | -4.506696 | 0.350840  | -1.470851 | C  | 2.775078  | 1.746695  | 2.835095  |
| C | -4.307404 | -0.955951 | -1.981032 | C  | 2.956813  | 1.022159  | 1.633331  |
| C | -5.330133 | 1.213012  | -2.228964 | C  | 2.170589  | -4.426168 | 0.322194  |
| C | -4.886139 | -1.383663 | -3.186949 | C  | 3.339871  | -5.203105 | 0.348577  |
| H | -3.680570 | -1.660261 | -1.410488 | C  | 4.595933  | -4.582077 | 0.448934  |
| C | -5.920811 | 0.797557  | -3.439123 | C  | 4.672068  | -3.184483 | 0.545491  |
| H | -5.515948 | 2.237544  | -1.864786 | C  | 3.498811  | -2.412799 | 0.537108  |
| C | -5.698398 | -0.502361 | -3.926263 | P  | 2.343760  | 1.723495  | 0.018272  |
| H | -4.699173 | -2.407479 | -3.552861 | Pd | 0.866732  | 0.073822  | -0.762716 |
| H | -6.559429 | 1.495732  | -4.006271 | H  | 3.842666  | -1.998309 | 3.056883  |
| H | -6.157089 | -0.828524 | -4.874463 | H  | 3.470316  | -0.680555 | 5.159056  |
| C | -4.123398 | -0.254608 | 1.163959  | H  | 2.812295  | 1.749814  | 5.003925  |
| C | -5.222331 | -1.143957 | 1.144903  | H  | 2.431789  | 2.790182  | 2.789395  |
| C | -3.291388 | -0.297141 | 2.309201  | H  | 1.195752  | -4.929310 | 0.233474  |
| C | -5.460164 | -2.053247 | 2.194630  | H  | 3.264981  | -6.299938 | 0.287420  |
| H | -5.902355 | -1.138710 | 0.276984  | H  | 5.518535  | -5.183236 | 0.460896  |
| C | -3.504047 | -1.208966 | 3.356661  | H  | 5.637146  | -2.664278 | 0.638994  |
| H | -2.434167 | 0.392489  | 2.370910  | C  | 3.813943  | 2.131397  | -1.014923 |
| C | -4.591616 | -2.101116 | 3.299413  | C  | 3.711093  | 3.178868  | -1.960512 |
| H | -6.324230 | -2.737158 | 2.143165  | C  | 4.981533  | 1.338459  | -0.993184 |
| H | -2.810610 | -1.231556 | 4.213049  | C  | 4.755066  | 3.423364  | -2.866974 |
| H | -4.763287 | -2.823999 | 4.113944  | H  | 2.808093  | 3.809262  | -1.990812 |
| C | -4.076579 | 2.345321  | 0.340032  | C  | 6.023152  | 1.588372  | -1.902967 |
| C | -3.420147 | 3.407604  | -0.329502 | H  | 5.075126  | 0.510542  | -0.277401 |
| C | -5.035909 | 2.701811  | 1.316166  | C  | 5.913785  | 2.626280  | -2.844626 |
| C | -3.704868 | 4.756016  | -0.046153 | H  | 4.659701  | 4.242257  | -3.597650 |
| H | -2.667738 | 3.171085  | -1.101912 | H  | 6.929340  | 0.962324  | -1.873546 |
| C | -5.328176 | 4.046534  | 1.613214  | H  | 6.731095  | 2.817126  | -3.558013 |
| H | -5.566258 | 1.902447  | 1.861319  | C  | 1.681616  | 3.373074  | 0.518466  |
| C | -4.662162 | 5.081963  | 0.933099  | C  | 0.288160  | 3.533260  | 0.670385  |
| H | -3.179284 | 5.557034  | -0.592924 | C  | 2.543219  | 4.457446  | 0.812121  |
| H | -6.080963 | 4.288872  | 2.382205  | C  | -0.239601 | 4.756082  | 1.121135  |
| H | -4.889629 | 6.136341  | 1.161582  | H  | -0.395098 | 2.703146  | 0.431135  |
| C | 2.823366  | -0.085243 | -3.878674 | C  | 2.010506  | 5.679923  | 1.250995  |
| C | 1.801227  | 0.833643  | -3.577759 | H  | 3.633368  | 4.343001  | 0.703395  |
| C | 0.463966  | 0.402862  | -3.458216 | C  | 0.619565  | 5.829698  | 1.409667  |
| C | 0.114596  | -0.956549 | -3.674506 | H  | -1.330292 | 4.861557  | 1.231586  |
| C | 1.151696  | -1.860288 | -3.996278 | H  | 2.687090  | 6.520092  | 1.475410  |
| C | 2.489540  | -1.434007 | -4.090358 | H  | 0.204970  | 6.789558  | 1.757024  |

|   |           |           |           |    |           |           |           |
|---|-----------|-----------|-----------|----|-----------|-----------|-----------|
| C | -0.654058 | -3.097187 | -0.241170 | H  | 4.196383  | -3.053601 | 4.012737  |
| C | -1.909003 | -3.075245 | 0.407465  | H  | 7.484066  | -0.498678 | 2.773422  |
| C | -0.495628 | -3.841517 | -1.433841 | H  | 6.544945  | -2.217121 | 4.351067  |
| C | -2.985279 | -3.804901 | -0.126722 | C  | 0.876510  | -0.180787 | 0.897571  |
| H | -2.064348 | -2.477952 | 1.318779  | N  | 1.989431  | -0.261507 | 0.532234  |
| C | -1.571643 | -4.577685 | -1.951448 | P  | -1.268331 | 1.959235  | 0.035761  |
| H | 0.467716  | -3.826524 | -1.966802 | C  | -0.107458 | 1.988343  | -1.400391 |
| C | -2.820003 | -4.559191 | -1.301020 | O  | -0.645110 | -0.338607 | -1.882409 |
| H | -3.960589 | -3.759199 | 0.381280  | C  | -1.983146 | -0.494386 | -2.169684 |
| H | -1.439102 | -5.155697 | -2.879952 | C  | -2.608921 | 0.140841  | -3.254332 |
| H | -3.668654 | -5.124224 | -1.717739 | C  | -3.970052 | -0.104400 | -3.496644 |
| C | 0.340019  | -1.712612 | 2.121371  | C  | -4.693784 | -0.986100 | -2.674465 |
| C | 0.337866  | -2.822995 | 2.995231  | C  | -4.062598 | -1.605155 | -1.582466 |
| C | 0.123540  | -0.421557 | 2.638651  | C  | -2.703153 | -1.355636 | -1.303700 |
| C | 0.129435  | -2.636750 | 4.369982  | C  | 0.691064  | 3.111674  | -1.710260 |
| H | 0.502776  | -3.837998 | 2.600187  | C  | 1.592090  | 3.080704  | -2.785356 |
| C | -0.077910 | -0.238070 | 4.016504  | C  | 1.717930  | 1.921419  | -3.567153 |
| H | 0.126234  | 0.445099  | 1.962981  | C  | 0.936535  | 0.792639  | -3.278406 |
| C | -0.073320 | -1.341928 | 4.883968  | C  | 0.033398  | 0.831964  | -2.206952 |
| H | 0.126398  | -3.507404 | 5.044885  | P  | -1.858423 | -1.873429 | 0.247302  |
| H | -0.239542 | 0.777690  | 4.408084  | Pd | -1.067309 | 0.048963  | 1.435830  |
| H | -0.231819 | -1.195960 | 5.964293  | H  | -2.031030 | 0.829821  | -3.888070 |

#### IM5

Free Energy = -3206.268279

Energy = -3207.059956

|   |          |           |           |
|---|----------|-----------|-----------|
| B | 3.466526 | -0.331291 | 0.067733  |
| C | 3.580040 | -1.385459 | -1.175289 |
| C | 2.466371 | -1.825436 | -1.926244 |
| C | 4.854505 | -1.841099 | -1.595208 |
| C | 2.615504 | -2.644069 | -3.061264 |
| H | 1.450797 | -1.536288 | -1.615117 |
| C | 5.016318 | -2.664246 | -2.723390 |
| H | 5.746752 | -1.540878 | -1.019760 |
| C | 3.892629 | -3.063673 | -3.471472 |
| H | 1.721746 | -2.962571 | -3.622584 |
| H | 6.024834 | -2.996978 | -3.021797 |
| H | 4.013191 | -3.704894 | -4.360389 |
| C | 3.870891 | 1.200829  | -0.372485 |
| C | 4.471973 | 1.530842  | -1.607231 |
| C | 3.641106 | 2.269621  | 0.528702  |
| C | 4.831195 | 2.854824  | -1.927247 |
| H | 4.659931 | 0.731624  | -2.343015 |
| C | 3.965597 | 3.599755  | 0.212891  |
| H | 3.206863 | 2.042533  | 1.518386  |
| C | 4.570369 | 3.898361  | -1.022889 |
| H | 5.303926 | 3.074465  | -2.899511 |
| H | 3.757353 | 4.407295  | 0.934733  |
| H | 4.838613 | 4.937507  | -1.275574 |
| C | 4.348571 | -0.843454 | 1.352469  |
| C | 3.848459 | -1.811583 | 2.256619  |
| C | 5.669628 | -0.386734 | 1.572252  |
| C | 4.619893 | -2.302138 | 3.324799  |
| H | 2.821525 | -2.191052 | 2.117902  |
| C | 6.457032 | -0.875667 | 2.632131  |
| H | 6.089495 | 0.381367  | 0.900466  |
| C | 5.934143 | -1.835891 | 3.516105  |

|    |           |           |           |
|----|-----------|-----------|-----------|
| H  | 4.196383  | -3.053601 | 4.012737  |
| H  | 7.484066  | -0.498678 | 2.773422  |
| H  | 6.544945  | -2.217121 | 4.351067  |
| C  | 0.876510  | -0.180787 | 0.897571  |
| N  | 1.989431  | -0.261507 | 0.532234  |
| P  | -1.268331 | 1.959235  | 0.035761  |
| C  | -0.107458 | 1.988343  | -1.400391 |
| O  | -0.645110 | -0.338607 | -1.882409 |
| C  | -1.983146 | -0.494386 | -2.169684 |
| C  | -2.608921 | 0.140841  | -3.254332 |
| C  | -3.970052 | -0.104400 | -3.496644 |
| C  | -4.693784 | -0.986100 | -2.674465 |
| C  | -4.062598 | -1.605155 | -1.582466 |
| C  | -2.703153 | -1.355636 | -1.303700 |
| C  | 0.691064  | 3.111674  | -1.710260 |
| C  | 1.592090  | 3.080704  | -2.785356 |
| C  | 1.717930  | 1.921419  | -3.567153 |
| C  | 0.936535  | 0.792639  | -3.278406 |
| C  | 0.033398  | 0.831964  | -2.206952 |
| P  | -1.858423 | -1.873429 | 0.247302  |
| Pd | -1.067309 | 0.048963  | 1.435830  |
| H  | -2.031030 | 0.829821  | -3.888070 |
| H  | -4.467979 | 0.403480  | -4.337112 |
| H  | -5.759251 | -1.179439 | -2.872521 |
| H  | -4.637441 | -2.271367 | -0.920423 |
| H  | 0.621344  | 4.017465  | -1.089680 |
| H  | 2.220406  | 3.959269  | -2.991033 |
| H  | 2.444824  | 1.883716  | -4.392646 |
| H  | 1.032882  | -0.137695 | -3.854888 |
| C  | -0.596108 | -3.105265 | -0.268567 |
| C  | -0.668280 | -3.780993 | -1.505776 |
| C  | 0.459358  | -3.391622 | 0.623341  |
| C  | 0.303814  | -4.740194 | -1.836155 |
| H  | -1.484201 | -3.554385 | -2.210817 |
| C  | 1.434718  | -4.341135 | 0.282214  |
| H  | 0.525676  | -2.850555 | 1.580111  |
| C  | 1.357105  | -5.017197 | -0.947394 |
| H  | 0.248966  | -5.261005 | -2.805215 |
| H  | 2.274181  | -4.532966 | 0.968086  |
| H  | 2.136066  | -5.743624 | -1.225751 |
| C  | -3.142530 | -2.888489 | 1.104632  |
| C  | -4.027702 | -2.257847 | 2.006665  |
| C  | -3.274129 | -4.274672 | 0.865006  |
| C  | -5.038619 | -2.995527 | 2.644434  |
| H  | -3.913962 | -1.181027 | 2.214574  |
| C  | -4.280241 | -5.011330 | 1.513074  |
| H  | -2.586066 | -4.782933 | 0.171602  |
| C  | -5.166007 | -4.374678 | 2.400259  |
| H  | -5.723410 | -2.491542 | 3.345026  |
| H  | -4.370385 | -6.092660 | 1.322216  |
| H  | -5.952322 | -4.955602 | 2.908139  |
| C  | -0.849946 | 3.476686  | 0.984395  |
| C  | -1.786367 | 4.497417  | 1.247152  |
| C  | 0.428818  | 3.527580  | 1.585918  |
| C  | -1.443478 | 5.556884  | 2.108092  |
| H  | -2.786887 | 4.464401  | 0.788652  |
| C  | 0.767627  | 4.591123  | 2.433287  |
| H  | 1.156555  | 2.727574  | 1.382261  |

|   |           |           |           |    |           |           |           |
|---|-----------|-----------|-----------|----|-----------|-----------|-----------|
| C | -0.171108 | 5.606381  | 2.702242  | C  | 6.535213  | -0.679591 | 2.599240  |
| H | -2.180793 | 6.348990  | 2.314723  | H  | 6.098132  | 0.580714  | 0.885750  |
| H | 1.767532  | 4.621469  | 2.894429  | C  | 6.057818  | -1.663711 | 3.482741  |
| H | 0.091082  | 6.436127  | 3.377664  | H  | 4.366573  | -2.937459 | 3.998518  |
| C | -2.899446 | 2.325957  | -0.742041 | H  | 7.553423  | -0.274043 | 2.724769  |
| C | -2.990414 | 3.275920  | -1.785133 | H  | 6.695467  | -2.035251 | 4.301912  |
| C | -4.058640 | 1.654368  | -0.309086 | C  | 0.902543  | -0.176240 | 0.957685  |
| C | -4.230884 | 3.547946  | -2.381642 | N  | 2.013114  | -0.182805 | 0.573459  |
| H | -2.084995 | 3.796060  | -2.136124 | P  | -1.418466 | 2.001847  | 0.195174  |
| C | -5.298164 | 1.925852  | -0.912844 | C  | -0.207498 | 2.275899  | -1.176005 |
| H | -3.979969 | 0.900597  | 0.490086  | O  | -0.500549 | -0.043087 | -1.843985 |
| C | -5.386514 | 2.871896  | -1.947720 | C  | -1.790191 | -0.291357 | -2.249011 |
| H | -4.294808 | 4.288425  | -3.194847 | C  | -2.399042 | 0.390164  | -3.315523 |
| H | -6.196015 | 1.381781  | -0.580520 | C  | -3.703013 | 0.038129  | -3.696808 |
| H | -6.357638 | 3.078205  | -2.425280 | C  | -4.386215 | -0.995787 | -3.031874 |
| H | -2.577707 | 0.283708  | 1.801790  | C  | -3.776440 | -1.657293 | -1.952972 |
| C | -0.575205 | 0.809510  | 3.522401  | C  | -2.480075 | -1.299273 | -1.528814 |
| C | -0.749920 | -0.586073 | 3.556948  | C  | 0.494177  | 3.487364  | -1.363131 |
| H | -1.678527 | -1.021882 | 3.965057  | C  | 1.469269  | 3.610614  | -2.365296 |
| H | 0.125775  | -1.255220 | 3.543526  | C  | 1.766727  | 2.520495  | -3.198239 |
| H | 0.457114  | 1.192916  | 3.422267  | C  | 1.074862  | 1.309365  | -3.041718 |
| C | -1.574941 | 1.796768  | 4.072744  | C  | 0.098118  | 1.198225  | -2.043238 |
| H | -1.279335 | 2.092213  | 5.105359  | P  | -1.688666 | -1.898090 | 0.024329  |
| H | -1.615776 | 2.730452  | 3.475107  | Pd | -1.029620 | -0.133927 | 1.456360  |
| H | -2.597213 | 1.367957  | 4.119386  | H  | -1.849711 | 1.194149  | -3.827222 |

### TS3

Free Energy = -3206.252007

Energy = -3207.041773

|   |          |           |           |   |           |           |           |
|---|----------|-----------|-----------|---|-----------|-----------|-----------|
| B | 3.485321 | -0.198587 | 0.093438  | H | 0.291553  | 4.340906  | -0.698815 |
| C | 3.614111 | -1.235953 | -1.165117 | H | 2.020759  | 4.555749  | -2.474763 |
| C | 2.518763 | -1.561242 | -1.997890 | H | 2.552741  | 2.603401  | -3.963491 |
| C | 4.871003 | -1.782181 | -1.522276 | H | 1.299283  | 0.434255  | -3.667047 |
| C | 2.668967 | -2.359484 | -3.145665 | C | -0.379801 | -3.073235 | -0.509633 |
| H | 1.514661 | -1.199960 | -1.733147 | C | -0.458439 | -3.748377 | -1.747178 |
| C | 5.033749 | -2.589670 | -2.663123 | C | 0.700000  | -3.333134 | 0.360177  |
| H | 5.748290 | -1.569936 | -0.887698 | C | 0.536644  | -4.673573 | -2.102301 |
| C | 3.930804 | -2.877283 | -3.488134 | H | -1.295655 | -3.545728 | -2.434150 |
| H | 1.787981 | -2.590444 | -3.766930 | C | 1.699303  | -4.248469 | -0.006412 |
| H | 6.028644 | -2.997307 | -2.910389 | H | 0.766853  | -2.798568 | 1.320242  |
| H | 4.053555 | -3.507049 | -4.384917 | C | 1.617789  | -4.920216 | -1.237431 |
| C | 3.850176 | 1.345092  | -0.335313 | H | 0.479015  | -5.190211 | -3.073433 |
| C | 4.581089 | 1.675433  | -1.498425 | H | 2.558423  | -4.414190 | 0.661620  |
| C | 3.484264 | 2.418268  | 0.513096  | H | 2.414402  | -5.618588 | -1.536895 |
| C | 4.937620 | 3.005022  | -1.797816 | C | -2.975067 | -2.988015 | 0.782316  |
| H | 4.880838 | 0.869862  | -2.189513 | C | -4.162011 | -2.397511 | 1.276964  |
| C | 3.815965 | 3.751425  | 0.219937  | C | -2.778031 | -4.374397 | 0.952013  |
| H | 2.933424 | 2.193382  | 1.443003  | C | -5.135523 | -3.178807 | 1.916726  |
| C | 4.553104 | 4.051154  | -0.941548 | H | -4.324973 | -1.314261 | 1.157826  |
| H | 5.513863 | 3.225441  | -2.712383 | C | -3.748181 | -5.152191 | 1.610569  |
| H | 3.501499 | 4.560860  | 0.900247  | H | -1.860749 | -4.851673 | 0.574231  |
| H | 4.823586 | 5.093827  | -1.176956 | C | -4.927571 | -4.560477 | 2.091902  |
| C | 4.401890 | -0.695690 | 1.360403  | H | -6.057618 | -2.705431 | 2.290119  |
| C | 3.948131 | -1.687818 | 2.263102  | H | -3.576959 | -6.232271 | 1.744203  |
| C | 5.713400 | -0.203429 | 1.559906  | H | -5.685628 | -5.172962 | 2.605317  |
| C | 4.754436 | -2.166527 | 3.310985  | C | -1.154706 | 3.470899  | 1.268364  |
| H | 2.929515 | -2.095954 | 2.142612  | C | -2.152789 | 4.431639  | 1.536599  |
|   |          |           |           | C | 0.095909  | 3.566369  | 1.927503  |
|   |          |           |           | C | -1.898094 | 5.477193  | 2.443359  |

|   |           |           |           |    |           |           |           |
|---|-----------|-----------|-----------|----|-----------|-----------|-----------|
| H | -3.129701 | 4.368920  | 1.031805  | C  | -5.127956 | 0.057242  | 2.469652  |
| C | 0.349340  | 4.620653  | 2.817209  | C  | -5.979353 | -1.733889 | 1.097546  |
| H | 0.875063  | 2.813579  | 1.725547  | C  | -6.213534 | -0.086934 | 3.351281  |
| C | -0.649377 | 5.578180  | 3.080639  | H  | -4.368741 | 0.832728  | 2.674762  |
| H | -2.682962 | 6.223742  | 2.645712  | C  | -7.074521 | -1.886438 | 1.969079  |
| H | 1.331220  | 4.690547  | 3.311905  | H  | -5.897843 | -2.394073 | 0.217618  |
| H | -0.452783 | 6.402632  | 3.784312  | C  | -7.196321 | -1.063306 | 3.102607  |
| C | -3.039309 | 2.314460  | -0.633246 | H  | -6.296839 | 0.565307  | 4.237189  |
| C | -3.191919 | 3.317336  | -1.617115 | H  | -7.836740 | -2.657062 | 1.763772  |
| C | -4.136983 | 1.494728  | -0.303931 | H  | -8.050927 | -1.182228 | 3.789068  |
| C | -4.428828 | 3.494053  | -2.256592 | C  | -1.361726 | -0.022616 | 1.457825  |
| H | -2.333977 | 3.952605  | -1.889914 | N  | -2.473640 | -0.145748 | 1.089336  |
| C | -5.373247 | 1.670048  | -0.948156 | P  | 2.157954  | -1.328812 | -0.170028 |
| H | -4.007010 | 0.698935  | 0.447079  | C  | 1.298756  | -1.750193 | -1.768192 |
| C | -5.520022 | 2.668714  | -1.925899 | O  | 0.279592  | 0.460710  | -1.900813 |
| H | -4.540150 | 4.275876  | -3.024973 | C  | 1.364758  | 1.271578  | -2.204406 |
| H | -6.219785 | 1.011950  | -0.696568 | C  | 1.992396  | 1.230865  | -3.459787 |
| H | -6.485905 | 2.800544  | -2.439164 | C  | 3.102084  | 2.057355  | -3.693546 |
| H | -2.515636 | -0.170278 | 2.091114  | C  | 3.583196  | 2.906091  | -2.680951 |
| C | -0.658175 | 0.517858  | 3.519871  | C  | 2.937237  | 2.950168  | -1.434434 |
| C | -1.907516 | -0.159320 | 3.612372  | C  | 1.811670  | 2.140805  | -1.183569 |
| H | -2.792213 | 0.483615  | 3.789671  | C  | 1.443983  | -3.014074 | -2.386233 |
| H | -0.630109 | 1.620112  | 3.553771  | C  | 0.619770  | -3.399469 | -3.455608 |
| H | 0.260097  | -0.000207 | 3.844748  | C  | -0.389564 | -2.537666 | -3.915109 |
| C | -2.033315 | -1.569443 | 4.152921  | C  | -0.511189 | -1.251965 | -3.367106 |
| H | -2.191830 | -1.528933 | 5.253510  | C  | 0.357507  | -0.854848 | -2.342616 |
| H | -2.897281 | -2.106349 | 3.712909  | P  | 0.896172  | 2.015249  | 0.403856  |
| H | -1.121085 | -2.164665 | 3.950612  | Pd | 0.573383  | -0.242178 | 1.202593  |

#### IM6

Free Energy = -3206.260733

Energy = -3207.055915

|   |           |           |           |   |           |           |           |
|---|-----------|-----------|-----------|---|-----------|-----------|-----------|
| B | -3.751890 | -0.497735 | 0.278703  | H | 1.620142  | 0.541957  | -4.232337 |
| C | -4.051139 | 0.764167  | -0.729055 | H | 3.605090  | 2.023996  | -4.672667 |
| C | -3.034149 | 1.200855  | -1.613776 | H | 4.472549  | 3.530083  | -2.856971 |
| C | -5.314217 | 1.384476  | -0.844672 | H | 3.328956  | 3.599562  | -0.637242 |
| C | -3.271610 | 2.181985  | -2.587593 | H | 2.198821  | -3.720338 | -2.011133 |
| H | -2.029015 | 0.756903  | -1.535738 | H | 0.748511  | -4.394781 | -3.907995 |
| C | -5.563408 | 2.378029  | -1.813896 | H | -1.077118 | -2.856611 | -4.712451 |
| H | -6.128687 | 1.074842  | -0.167939 | H | -1.264807 | -0.535850 | -3.725260 |
| C | -4.545300 | 2.773920  | -2.696991 | C | -0.573198 | 3.091929  | 0.108112  |
| H | -2.455552 | 2.496616  | -3.259048 | C | -0.678164 | 3.917094  | -1.032656 |
| H | -6.563021 | 2.839887  | -1.882806 | C | -1.614987 | 3.089228  | 1.060624  |
| H | -4.737698 | 3.546529  | -3.459977 | C | -1.818986 | 4.714734  | -1.219687 |
| C | -3.350692 | -1.816741 | -0.625256 | H | 0.123260  | 3.928575  | -1.787419 |
| C | -4.071836 | -2.101259 | -1.811681 | C | -2.760558 | 3.873751  | 0.857418  |
| C | -2.312202 | -2.716806 | -0.284863 | H | -1.542458 | 2.457034  | 1.958095  |
| C | -3.786597 | -3.227166 | -2.606003 | C | -2.866662 | 4.685221  | -0.284690 |
| H | -4.873343 | -1.411766 | -2.126887 | H | -1.901132 | 5.342724  | -2.120834 |
| C | -2.010809 | -3.840197 | -1.074922 | H | -3.582988 | 3.833847  | 1.588118  |
| H | -1.716270 | -2.537388 | 0.624227  | H | -3.777096 | 5.279767  | -0.455872 |
| C | -2.750326 | -4.104863 | -2.240873 | C | 1.878444  | 2.992064  | 1.622541  |
| H | -4.372460 | -3.415483 | -3.521648 | C | 2.463520  | 2.326715  | 2.722260  |
| H | -1.192212 | -4.518374 | -0.780107 | C | 2.024340  | 4.392324  | 1.501303  |
| H | -2.513919 | -4.981971 | -2.865288 | C | 3.214984  | 3.044585  | 3.668410  |
| C | -4.979019 | -0.760250 | 1.321832  | H | 2.309601  | 1.240048  | 2.847790  |
|   |           |           |           | C | 2.780710  | 5.105963  | 2.445290  |
|   |           |           |           | H | 1.532450  | 4.926257  | 0.672227  |
|   |           |           |           | C | 3.381558  | 4.433174  | 3.525574  |
|   |           |           |           | H | 3.663258  | 2.517004  | 4.525162  |
|   |           |           |           | H | 2.893443  | 6.197019  | 2.342551  |
|   |           |           |           | H | 3.968638  | 4.997229  | 4.267806  |

|   |           |           |           |    |           |           |           |
|---|-----------|-----------|-----------|----|-----------|-----------|-----------|
| C | 2.777163  | -2.963527 | 0.432270  | H  | 4.419087  | -2.627178 | -3.956031 |
| C | 4.086445  | -3.098466 | 0.944612  | H  | 5.721320  | -4.372831 | -2.693571 |
| C | 1.891176  | -4.065199 | 0.516620  | C  | 4.421833  | 1.484146  | -0.481666 |
| C | 4.498429  | -4.308725 | 1.528904  | C  | 3.809437  | 2.744099  | -0.264092 |
| H | 4.794273  | -2.257008 | 0.888474  | C  | 5.733379  | 1.487811  | -1.007668 |
| C | 2.312707  | -5.275579 | 1.089083  | C  | 4.469804  | 3.948614  | -0.559785 |
| H | 0.869687  | -3.983337 | 0.115074  | H  | 2.789313  | 2.781108  | 0.157321  |
| C | 3.615528  | -5.399408 | 1.602843  | C  | 6.408182  | 2.688788  | -1.303282 |
| H | 5.522903  | -4.398041 | 1.923741  | H  | 6.241178  | 0.525287  | -1.190160 |
| H | 1.610894  | -6.122700 | 1.141262  | C  | 5.777306  | 3.925505  | -1.082400 |
| H | 3.942254  | -6.346555 | 2.060313  | H  | 3.964001  | 4.912018  | -0.378085 |
| C | 3.715807  | -0.449135 | -0.612452 | H  | 7.432936  | 2.658215  | -1.710700 |
| C | 4.343414  | -0.611841 | -1.863579 | H  | 6.301432  | 4.867451  | -1.314788 |
| C | 4.316389  | 0.365881  | 0.370615  | C  | 1.060338  | 0.325034  | -0.867409 |
| C | 5.564652  | 0.033107  | -2.121505 | N  | 2.184020  | 0.251891  | -0.532841 |
| H | 3.868672  | -1.232636 | -2.639766 | P  | -1.442953 | -1.805968 | -0.097055 |
| C | 5.542029  | 0.999816  | 0.113348  | C  | -1.126602 | -2.003325 | 1.729656  |
| H | 3.814765  | 0.513192  | 1.338810  | O  | -1.860638 | 0.274304  | 2.168067  |
| C | 6.167962  | 0.833041  | -1.134535 | C  | -3.138199 | 0.467802  | 1.695871  |
| H | 6.045502  | -0.085656 | -3.105385 | C  | -4.239287 | -0.267278 | 2.165213  |
| H | 5.998917  | 1.637204  | 0.886635  | C  | -5.507692 | -0.018837 | 1.620350  |
| H | 7.124141  | 1.338381  | -1.344173 | C  | -5.665164 | 0.950724  | 0.614759  |
| H | 1.464711  | -0.969484 | 4.086881  | C  | -4.554280 | 1.677035  | 0.152129  |
| C | 0.400755  | -1.931695 | 2.448828  | C  | -3.269108 | 1.461113  | 0.696356  |
| C | 1.567586  | -1.865940 | 3.434224  | C  | -0.604622 | -3.199070 | 2.276267  |
| H | 2.539244  | -1.757974 | 2.901150  | C  | -0.419032 | -3.351357 | 3.660059  |
| H | 0.413590  | -2.860704 | 1.849347  | C  | -0.740851 | -2.299165 | 4.534714  |
| H | -0.569386 | -1.894492 | 2.982769  | C  | -1.241004 | -1.094585 | 4.017833  |
| C | 1.642671  | -3.132126 | 4.309026  | C  | -1.436684 | -0.957968 | 2.634529  |
| H | 2.472966  | -3.070629 | 5.045125  | P  | -1.706338 | 2.081952  | -0.082564 |
| H | 0.699337  | -3.289811 | 4.874316  | Pd | -0.856852 | 0.297522  | -1.401492 |
| H | 1.814763  | -4.029985 | 3.678665  | H  | -4.086686 | -1.042039 | 2.931166  |

### TS3'

Free Energy = -3206.24329

Energy = -3207.033466

|   |          |           |           |   |           |           |           |
|---|----------|-----------|-----------|---|-----------|-----------|-----------|
| B | 3.646811 | 0.108913  | -0.047771 | H | -0.586756 | -2.407677 | 5.619548  |
| C | 3.594200 | -0.048290 | 1.583288  | H | -1.481094 | -0.239551 | 4.666699  |
| C | 2.582683 | -0.800721 | 2.228163  | C | -0.574041 | 2.808750  | 1.201715  |
| C | 4.575330 | 0.542955  | 2.414163  | C | 0.406808  | 1.983246  | 1.797193  |
| C | 2.537574 | -0.945826 | 3.625738  | C | -0.588741 | 4.186067  | 1.516746  |
| H | 1.791042 | -1.280356 | 1.627491  | C | 1.345516  | 2.516003  | 2.692567  |
| C | 4.546332 | 0.402586  | 3.814613  | H | 0.455639  | 0.914248  | 1.556384  |
| H | 5.376006 | 1.143815  | 1.951320  | C | 0.353585  | 4.717908  | 2.415112  |
| C | 3.520995 | -0.339066 | 4.428410  | H | -1.320936 | 4.862182  | 1.051534  |
| H | 1.725976 | -1.529363 | 4.086026  | C | 1.322374  | 3.887271  | 3.002816  |
| H | 5.324533 | 0.883181  | 4.431135  | H | 2.107730  | 1.852688  | 3.129263  |
| H | 3.487272 | -0.443839 | 5.525409  | H | 0.332396  | 5.795305  | 2.645284  |
| C | 4.237524 | -1.227545 | -0.793547 | H | 2.069561  | 4.308541  | 3.694017  |
| C | 4.964705 | -2.228061 | -0.109811 | C | -2.219166 | 3.558162  | -1.063881 |
| C | 4.058593 | -1.406410 | -2.188656 | C | -1.555725 | 3.786940  | -2.289083 |
| C | 5.497718 | -3.347454 | -0.780467 | C | -3.175677 | 4.497888  | -0.612271 |
| H | 5.117537 | -2.128552 | 0.978130  | C | -1.850001 | 4.926181  | -3.057301 |
| C | 4.580273 | -2.519041 | -2.870319 | H | -0.792660 | 3.066830  | -2.628278 |
| H | 3.495472 | -0.644821 | -2.755728 | C | -3.474430 | 5.630902  | -1.387494 |
| C | 5.308576 | -3.497419 | -2.165767 | H | -3.686979 | 4.349688  | 0.351809  |
| H | 6.061937 | -4.108786 | -0.216009 | C | -2.814685 | 5.846081  | -2.611132 |

|   |           |           |           |    |           |           |           |
|---|-----------|-----------|-----------|----|-----------|-----------|-----------|
| H | -1.320179 | 5.095360  | -4.008155 | H  | 3.455303  | -0.730629 | -2.766690 |
| H | -4.223238 | 6.354824  | -1.028305 | C  | 5.147584  | -3.656960 | -2.179271 |
| H | -3.049623 | 6.736926  | -3.215182 | H  | 5.903755  | -4.285164 | -0.235843 |
| C | -0.474849 | -3.219653 | -0.777818 | H  | 4.269643  | -2.761929 | -3.962856 |
| C | -1.064630 | -4.286801 | -1.488071 | H  | 5.511696  | -4.554623 | -2.705492 |
| C | 0.935652  | -3.147814 | -0.679181 | C  | 4.611360  | 1.348292  | -0.428922 |
| C | -0.251108 | -5.260399 | -2.097097 | C  | 4.136654  | 2.646158  | -0.111464 |
| H | -2.160237 | -4.353836 | -1.577012 | C  | 5.895316  | 1.256071  | -1.010568 |
| C | 1.741211  | -4.131053 | -1.269650 | C  | 4.901635  | 3.796492  | -0.367025 |
| H | 1.419074  | -2.311790 | -0.152132 | H  | 3.142108  | 2.753769  | 0.357036  |
| C | 1.148423  | -5.186141 | -1.989286 | C  | 6.674751  | 2.401678  | -1.266986 |
| H | -0.719688 | -6.085527 | -2.657587 | H  | 6.295651  | 0.261467  | -1.271350 |
| H | 2.835804  | -4.052934 | -1.182696 | C  | 6.179328  | 3.677865  | -0.948055 |
| H | 1.782086  | -5.949639 | -2.468011 | H  | 4.503056  | 4.792204  | -0.108619 |
| C | -3.208978 | -2.367831 | -0.194009 | H  | 7.674574  | 2.296643  | -1.721332 |
| C | -3.697551 | -3.432075 | 0.599573  | H  | 6.785103  | 4.577025  | -1.149295 |
| C | -4.096108 | -1.696036 | -1.057413 | C  | 1.168698  | 0.455209  | -0.980632 |
| C | -5.046686 | -3.810957 | 0.523546  | N  | 2.273884  | 0.322956  | -0.599499 |
| H | -3.022311 | -3.962370 | 1.289084  | P  | -1.551503 | -1.728199 | -0.103123 |
| C | -5.445820 | -2.078750 | -1.136378 | C  | -1.290864 | -1.929208 | 1.737761  |
| H | -3.730852 | -0.839370 | -1.645260 | O  | -1.949714 | 0.373657  | 2.163191  |
| C | -5.924441 | -3.136040 | -0.345784 | C  | -3.200613 | 0.605798  | 1.639118  |
| H | -5.416792 | -4.638254 | 1.150167  | C  | -4.348989 | -0.075068 | 2.072727  |
| H | -6.128673 | -1.532960 | -1.806272 | C  | -5.582005 | 0.221208  | 1.471446  |
| H | -6.984465 | -3.431463 | -0.399244 | C  | -5.656602 | 1.182762  | 0.448498  |
| H | -2.309762 | 0.352325  | -2.077863 | C  | -4.497838 | 1.855004  | 0.021980  |
| C | -1.555348 | 0.218340  | -3.591702 | C  | -3.247333 | 1.587401  | 0.621029  |
| C | -0.222457 | -0.251624 | -3.508699 | C  | -0.828364 | -3.143220 | 2.298295  |
| H | 0.578642  | 0.491514  | -3.673765 | C  | -0.685252 | -3.302647 | 3.686636  |
| H | -1.758079 | 1.255918  | -3.906307 | C  | -0.989475 | -2.239706 | 4.554239  |
| H | -2.351860 | -0.506071 | -3.842835 | C  | -1.430197 | -1.017578 | 4.024688  |
| C | 0.168493  | -1.688518 | -3.726459 | C  | -1.583585 | -0.874071 | 2.636721  |
| H | 1.065464  | -1.964293 | -3.137568 | P  | -1.617063 | 2.117253  | -0.071352 |
| H | -0.646889 | -2.389805 | -3.461815 | Pd | -0.725882 | 0.343404  | -1.422532 |
| H | 0.421795  | -1.844731 | -4.800186 | H  | -4.261636 | -0.844452 | 2.854215  |

### IM6'

Free Energy = -3206.249762

Energy = -3207.041407

|   |          |           |           |
|---|----------|-----------|-----------|
| B | 3.699011 | 0.040140  | -0.059307 |
| C | 3.565202 | -0.155277 | 1.563951  |
| C | 2.486327 | -0.866377 | 2.143007  |
| C | 4.542119 | 0.351433  | 2.453522  |
| C | 2.372551 | -1.051627 | 3.531460  |
| H | 1.694187 | -1.279153 | 1.495869  |
| C | 4.446648 | 0.168267  | 3.846427  |
| H | 5.395437 | 0.917189  | 2.043580  |
| C | 3.355756 | -0.530818 | 4.393273  |
| H | 1.507980 | -1.597512 | 3.938546  |
| H | 5.225159 | 0.581881  | 4.509406  |
| H | 3.269870 | -0.667994 | 5.483844  |
| C | 4.200500 | -1.329633 | -0.810449 |
| C | 4.893590 | -2.356760 | -0.129583 |
| C | 3.992575 | -1.511577 | -2.200991 |
| C | 5.365510 | -3.503864 | -0.798372 |
| H | 5.067576 | -2.256229 | 0.955057  |
| C | 4.452797 | -2.652710 | -2.880719 |

|    |           |           |           |
|----|-----------|-----------|-----------|
| H  | 3.455303  | -0.730629 | -2.766690 |
| C  | 5.147584  | -3.656960 | -2.179271 |
| H  | 5.903755  | -4.285164 | -0.235843 |
| H  | 4.269643  | -2.761929 | -3.962856 |
| H  | 5.511696  | -4.554623 | -2.705492 |
| C  | 4.611360  | 1.348292  | -0.428922 |
| C  | 4.136654  | 2.646158  | -0.111464 |
| C  | 5.895316  | 1.256071  | -1.010568 |
| C  | 4.901635  | 3.796492  | -0.367025 |
| H  | 3.142108  | 2.753769  | 0.357036  |
| C  | 6.674751  | 2.401678  | -1.266986 |
| H  | 6.295651  | 0.261467  | -1.271350 |
| C  | 6.179328  | 3.677865  | -0.948055 |
| H  | 4.503056  | 4.792204  | -0.108619 |
| H  | 7.674574  | 2.296643  | -1.721332 |
| H  | 6.785103  | 4.577025  | -1.149295 |
| C  | 1.168698  | 0.455209  | -0.980632 |
| N  | 2.273884  | 0.322956  | -0.599499 |
| P  | -1.551503 | -1.728199 | -0.103123 |
| C  | -1.290864 | -1.929208 | 1.737761  |
| O  | -1.949714 | 0.373657  | 2.163191  |
| C  | -3.200613 | 0.605798  | 1.639118  |
| C  | -4.348989 | -0.075068 | 2.072727  |
| C  | -5.582005 | 0.221208  | 1.471446  |
| C  | -5.656602 | 1.182762  | 0.448498  |
| C  | -4.497838 | 1.855004  | 0.021980  |
| C  | -3.247333 | 1.587401  | 0.621029  |
| C  | -0.828364 | -3.143220 | 2.298295  |
| C  | -0.685252 | -3.302647 | 3.686636  |
| C  | -0.989475 | -2.239706 | 4.554239  |
| C  | -1.430197 | -1.017578 | 4.024688  |
| C  | -1.583585 | -0.874071 | 2.636721  |
| P  | -1.617063 | 2.117253  | -0.071352 |
| Pd | -0.725882 | 0.343404  | -1.422532 |
| H  | -4.261636 | -0.844452 | 2.854215  |
| H  | -6.484928 | -0.321217 | 1.790931  |
| H  | -6.620419 | 1.399274  | -0.037476 |
| H  | -4.567137 | 2.574193  | -0.808090 |
| H  | -0.573126 | -3.981283 | 1.632335  |
| H  | -0.322779 | -4.261628 | 4.087850  |
| H  | -0.867587 | -2.353748 | 5.642567  |
| H  | -1.655970 | -0.153613 | 4.666855  |
| C  | -0.529701 | 2.807657  | 1.264137  |
| C  | 0.446805  | 1.956216  | 1.827206  |
| C  | -0.567904 | 4.163525  | 1.655653  |
| C  | 1.366101  | 2.445172  | 2.766851  |
| H  | 0.499048  | 0.901358  | 1.527148  |
| C  | 0.352952  | 4.651155  | 2.599995  |
| H  | -1.299109 | 4.857374  | 1.215378  |
| C  | 1.321382  | 3.796433  | 3.154157  |
| H  | 2.126516  | 1.765365  | 3.180447  |
| H  | 0.316847  | 5.712734  | 2.893144  |
| H  | 2.051525  | 4.184662  | 3.882088  |
| C  | -2.009387 | 3.592055  | -1.110225 |
| C  | -1.303580 | 3.749770  | -2.323828 |
| C  | -2.930397 | 4.591414  | -0.715134 |
| C  | -1.519185 | 4.878840  | -3.132350 |
| H  | -0.570646 | 2.981124  | -2.623466 |

|   |           |           |           |    |           |           |           |
|---|-----------|-----------|-----------|----|-----------|-----------|-----------|
| C | -3.146788 | 5.716120  | -1.528465 | C  | 5.999589  | 2.047334  | 3.006359  |
| H | -3.483399 | 4.493272  | 0.232129  | H  | 6.435490  | 1.274872  | 1.027533  |
| C | -2.443806 | 5.861392  | -2.738308 | C  | 3.655042  | 2.156324  | 3.617527  |
| H | -0.957779 | 4.991464  | -4.073395 | H  | 2.250566  | 1.425625  | 2.138345  |
| H | -3.867220 | 6.487053  | -1.211558 | C  | 5.003962  | 2.379241  | 3.944528  |
| H | -2.615297 | 6.745678  | -3.372559 | H  | 7.061239  | 2.231580  | 3.242319  |
| C | -0.622582 | -3.200090 | -0.713574 | H  | 2.861382  | 2.425997  | 4.335128  |
| C | -1.232914 | -4.341505 | -1.274786 | H  | 5.278447  | 2.818683  | 4.917689  |
| C | 0.789325  | -3.116726 | -0.671289 | C  | 4.349883  | -1.002303 | -0.193874 |
| C | -0.435972 | -5.381288 | -1.789676 | C  | 3.735345  | -1.784089 | -1.203971 |
| H | -2.330427 | -4.418748 | -1.320920 | C  | 5.341317  | -1.645565 | 0.581526  |
| C | 1.579130  | -4.164381 | -1.163892 | C  | 4.085700  | -3.123920 | -1.439071 |
| H | 1.283265  | -2.217222 | -0.274153 | H  | 2.955410  | -1.323492 | -1.831298 |
| C | 0.966188  | -5.297132 | -1.732147 | C  | 5.716264  | -2.983224 | 0.349835  |
| H | -0.918910 | -6.265793 | -2.235782 | H  | 5.831269  | -1.089770 | 1.397943  |
| H | 2.675668  | -4.078179 | -1.121639 | C  | 5.090366  | -3.730795 | -0.663239 |
| H | 1.586367  | -6.113758 | -2.134966 | H  | 3.567220  | -3.695151 | -2.227780 |
| C | -3.336653 | -2.213108 | -0.239344 | H  | 6.496179  | -3.449275 | 0.975619  |
| C | -3.922631 | -3.207939 | 0.577199  | H  | 5.376951  | -4.780591 | -0.841168 |
| C | -4.142608 | -1.529559 | -1.172205 | C  | 1.273973  | 0.842123  | -0.519783 |
| C | -5.287509 | -3.511338 | 0.453518  | N  | 2.426411  | 0.698591  | -0.271965 |
| H | -3.309804 | -3.740741 | 1.321340  | P  | -2.914965 | 1.088114  | -0.155846 |
| C | -5.507811 | -1.837497 | -1.298406 | C  | -4.257014 | 0.384871  | -1.223479 |
| H | -3.704746 | -0.724276 | -1.780493 | O  | -3.188811 | -1.784738 | -1.048511 |
| C | -6.083013 | -2.828013 | -0.485819 | C  | -3.233051 | -2.257673 | 0.251660  |
| H | -5.735506 | -4.285135 | 1.097471  | C  | -4.432527 | -2.491370 | 0.940408  |
| H | -6.127219 | -1.285056 | -2.022361 | C  | -4.377380 | -2.996042 | 2.250780  |
| H | -7.155412 | -3.063821 | -0.576211 | C  | -3.140431 | -3.275269 | 2.857669  |
| H | -2.178071 | 0.470180  | -2.621137 | C  | -1.945090 | -3.018722 | 2.164894  |
| C | -1.642167 | 0.112657  | -3.618367 | C  | -1.975845 | -2.489241 | 0.859214  |
| C | -0.247361 | -0.362873 | -3.372662 | C  | -5.307669 | 1.156973  | -1.766943 |
| H | 0.537157  | 0.336734  | -3.717027 | C  | -6.275180 | 0.573194  | -2.602307 |
| H | -1.726891 | 1.012014  | -4.260090 | C  | -6.205484 | -0.795597 | -2.914612 |
| H | -2.330116 | -0.688463 | -3.959185 | C  | -5.175432 | -1.584980 | -2.377976 |
| C | 0.104881  | -1.803431 | -3.636222 | C  | -4.221103 | -0.997394 | -1.533439 |
| H | 1.077686  | -2.074114 | -3.180879 | P  | -0.502248 | -1.813964 | -0.004431 |
| H | -0.661729 | -2.509424 | -3.259779 | Pd | -0.616868 | 0.471736  | -0.484072 |
| H | 0.199722  | -1.966149 | -4.736019 | H  | -5.394919 | -2.266245 | 0.457623  |

#### TS4

Free Energy = -3206.25416

Energy = -3207.047903

|   |          |           |           |   |           |           |           |
|---|----------|-----------|-----------|---|-----------|-----------|-----------|
| B | 3.945096 | 0.582104  | -0.042999 | H | -6.956109 | -1.253951 | -3.577396 |
| C | 4.614646 | 1.511022  | -1.231973 | H | -5.091956 | -2.659286 | -2.600381 |
| C | 4.272251 | 2.885216  | -1.309335 | C | -0.275020 | -2.881986 | -1.484609 |
| C | 5.514373 | 1.018101  | -2.202427 | C | 0.425021  | -2.360503 | -2.592982 |
| C | 4.789414 | 3.724942  | -2.309874 | C | -0.734906 | -4.215951 | -1.511752 |
| H | 3.587955 | 3.306414  | -0.551432 | C | 0.687625  | -3.174728 | -3.706923 |
| C | 6.047742 | 1.851497  | -3.206311 | H | 0.761620  | -1.311343 | -2.581182 |
| H | 5.804273 | -0.045825 | -2.173521 | C | -0.477597 | -5.024231 | -2.632006 |
| C | 5.683719 | 3.207514  | -3.267509 | H | -1.289798 | -4.623679 | -0.651337 |
| H | 4.502743 | 4.789915  | -2.341521 | C | 0.239433  | -4.507898 | -3.726628 |
| H | 6.751935 | 1.437027  | -3.947642 | H | 1.243438  | -2.762901 | -4.563970 |
| H | 6.097193 | 3.860937  | -4.053572 | H | -0.835796 | -6.066059 | -2.647624 |
| C | 4.293658 | 1.235248  | 1.416035  | H | 0.444635  | -5.145434 | -4.601401 |
| C | 5.643219 | 1.496225  | 1.763037  | C | 0.903232  | -2.243202 | 1.100527  |
| C | 3.314911 | 1.592419  | 2.372617  | C | 1.257257  | -1.320868 | 2.109361  |

|   |           |           |           |    |           |           |           |
|---|-----------|-----------|-----------|----|-----------|-----------|-----------|
| C | 1.646506  | -3.434101 | 0.956833  | C  | 4.789972  | 1.863875  | -0.611198 |
| C | 2.331400  | -1.588120 | 2.970785  | C  | 6.173064  | 1.632551  | -0.809788 |
| H | 0.705253  | -0.371135 | 2.197849  | C  | 4.322810  | 3.174867  | -0.857845 |
| C | 2.718559  | -3.699321 | 1.823213  | C  | 7.043007  | 2.652028  | -1.233948 |
| H | 1.409043  | -4.145461 | 0.151750  | H  | 6.577599  | 0.621589  | -0.632670 |
| C | 3.064549  | -2.777964 | 2.825764  | C  | 5.180784  | 4.205079  | -1.286796 |
| H | 2.620403  | -0.847091 | 3.730938  | H  | 3.256590  | 3.403136  | -0.700738 |
| H | 3.310989  | -4.616448 | 1.687369  | C  | 6.549366  | 3.947251  | -1.478996 |
| H | 3.928480  | -2.974467 | 3.479491  | H  | 8.114959  | 2.434863  | -1.377580 |
| C | -3.104730 | 2.907994  | -0.363012 | H  | 4.778355  | 5.216012  | -1.469902 |
| C | -3.243487 | 3.776593  | 0.741066  | H  | 7.227496  | 4.748786  | -1.815287 |
| C | -2.938431 | 3.456212  | -1.658385 | C  | 3.987908  | 0.696703  | 1.597048  |
| C | -3.227868 | 5.169340  | 0.548997  | C  | 5.075872  | 0.060030  | 2.240442  |
| H | -3.361343 | 3.365438  | 1.755762  | C  | 3.119412  | 1.455792  | 2.416938  |
| C | -2.942056 | 4.847422  | -1.845183 | C  | 5.274883  | 0.152264  | 3.629382  |
| H | -2.820890 | 2.788992  | -2.528545 | H  | 5.786341  | -0.529200 | 1.636983  |
| C | -3.083081 | 5.707876  | -0.740996 | C  | 3.308274  | 1.562604  | 3.806947  |
| H | -3.333918 | 5.838207  | 1.417780  | H  | 2.265196  | 1.980988  | 1.954283  |
| H | -2.820905 | 5.261421  | -2.858656 | C  | 4.388396  | 0.903541  | 4.423463  |
| H | -3.071689 | 6.799365  | -0.886918 | H  | 6.129751  | -0.364358 | 4.097188  |
| C | -3.543014 | 0.753357  | 1.547347  | H  | 2.609023  | 2.162068  | 4.414086  |
| C | -4.913276 | 0.878182  | 1.866326  | H  | 4.541006  | 0.978913  | 5.512628  |
| C | -2.626317 | 0.368210  | 2.546846  | C  | 1.244681  | 1.204125  | -0.751139 |
| C | -5.355833 | 0.621151  | 3.172998  | N  | 2.368252  | 0.968878  | -0.390111 |
| H | -5.636550 | 1.168812  | 1.087735  | P  | -2.901480 | 1.129841  | -0.045206 |
| C | -3.073952 | 0.106898  | 3.852659  | C  | -4.200443 | 0.515622  | -1.217131 |
| H | -1.560824 | 0.252388  | 2.290200  | O  | -3.072696 | -1.641691 | -1.283462 |
| C | -4.437380 | 0.233735  | 4.167008  | C  | -3.146809 | -2.186474 | -0.011637 |
| H | -6.425926 | 0.717474  | 3.416766  | C  | -4.377970 | -2.456628 | 0.608410  |
| H | -2.352945 | -0.209247 | 4.622450  | C  | -4.392074 | -3.039584 | 1.885111  |
| H | -4.788752 | 0.023558  | 5.189765  | C  | -3.185349 | -3.364847 | 2.526222  |
| C | 0.425443  | 2.494809  | -1.059548 | C  | -1.960422 | -3.082159 | 1.900476  |
| C | 0.544601  | 3.486615  | 0.093087  | C  | -1.916275 | -2.472763 | 0.628207  |
| H | 1.433728  | 3.235402  | 0.711609  | C  | -5.260421 | 1.317011  | -1.697711 |
| H | 1.241521  | 2.595729  | -1.801735 | C  | -6.167676 | 0.824072  | -2.650610 |
| H | -0.523734 | 2.618457  | -1.624365 | C  | -6.026359 | -0.482826 | -3.149026 |
| H | -0.341787 | 3.393205  | 0.757806  | C  | -4.990111 | -1.303993 | -2.675715 |
| C | 0.661672  | 4.929039  | -0.418346 | C  | -4.097890 | -0.810276 | -1.711673 |
| H | 0.730100  | 5.649743  | 0.423837  | P  | -0.356985 | -1.802922 | -0.108556 |
| H | 1.569786  | 5.056996  | -1.046023 | Pd | -0.639115 | 0.449375  | -0.522337 |
| H | -0.219215 | 5.212163  | -1.031897 | H  | -5.315211 | -2.196121 | 0.094943  |

### IM7

Free Energy = -3206.261732

Energy = -3207.056443

|   |          |           |           |
|---|----------|-----------|-----------|
| B | 3.825166 | 0.655954  | -0.032258 |
| C | 4.157018 | -0.782029 | -0.758920 |
| C | 4.079553 | -2.022841 | -0.087999 |
| C | 4.465563 | -0.823686 | -2.142247 |
| C | 4.311676 | -3.242929 | -0.750215 |
| H | 3.825663 | -2.037640 | 0.982027  |
| C | 4.708754 | -2.034325 | -2.815267 |
| H | 4.531274 | 0.123725  | -2.703908 |
| C | 4.634625 | -3.254488 | -2.117593 |
| H | 4.231361 | -4.190403 | -0.192245 |
| H | 4.958578 | -2.026936 | -3.889792 |
| H | 4.816199 | -4.207696 | -2.640577 |

|    |           |           |           |
|----|-----------|-----------|-----------|
| C  | 4.789972  | 1.863875  | -0.611198 |
| C  | 6.173064  | 1.632551  | -0.809788 |
| C  | 4.322810  | 3.174867  | -0.857845 |
| C  | 7.043007  | 2.652028  | -1.233948 |
| H  | 6.577599  | 0.621589  | -0.632670 |
| C  | 5.180784  | 4.205079  | -1.286796 |
| H  | 3.256590  | 3.403136  | -0.700738 |
| C  | 6.549366  | 3.947251  | -1.478996 |
| H  | 8.114959  | 2.434863  | -1.377580 |
| H  | 4.778355  | 5.216012  | -1.469902 |
| H  | 7.227496  | 4.748786  | -1.815287 |
| C  | 3.987908  | 0.696703  | 1.597048  |
| C  | 5.075872  | 0.060030  | 2.240442  |
| C  | 3.119412  | 1.455792  | 2.416938  |
| C  | 5.274883  | 0.152264  | 3.629382  |
| H  | 5.786341  | -0.529200 | 1.636983  |
| C  | 3.308274  | 1.562604  | 3.806947  |
| H  | 2.265196  | 1.980988  | 1.954283  |
| C  | 4.388396  | 0.903541  | 4.423463  |
| H  | 6.129751  | -0.364358 | 4.097188  |
| H  | 2.609023  | 2.162068  | 4.414086  |
| H  | 4.541006  | 0.978913  | 5.512628  |
| C  | 1.244681  | 1.204125  | -0.751139 |
| N  | 2.368252  | 0.968878  | -0.390111 |
| P  | -2.901480 | 1.129841  | -0.045206 |
| C  | -4.200443 | 0.515622  | -1.217131 |
| O  | -3.072696 | -1.641691 | -1.283462 |
| C  | -3.146809 | -2.186474 | -0.011637 |
| C  | -4.377970 | -2.456628 | 0.608410  |
| C  | -4.392074 | -3.039584 | 1.885111  |
| C  | -3.185349 | -3.364847 | 2.526222  |
| C  | -1.960422 | -3.082159 | 1.900476  |
| C  | -1.916275 | -2.472763 | 0.628207  |
| C  | -5.260421 | 1.317011  | -1.697711 |
| C  | -6.167676 | 0.824072  | -2.650610 |
| C  | -6.026359 | -0.482826 | -3.149026 |
| C  | -4.990111 | -1.303993 | -2.675715 |
| C  | -4.097890 | -0.810276 | -1.711673 |
| P  | -0.356985 | -1.802922 | -0.108556 |
| Pd | -0.639115 | 0.449375  | -0.522337 |
| H  | -5.315211 | -2.196121 | 0.094943  |
| H  | -5.355945 | -3.236136 | 2.379753  |
| H  | -3.194018 | -3.822870 | 3.527113  |
| H  | -1.019212 | -3.308996 | 2.423080  |
| H  | -5.367458 | 2.349483  | -1.330125 |
| H  | -6.985115 | 1.468960  | -3.009194 |
| H  | -6.728023 | -0.869250 | -3.904803 |
| H  | -4.856101 | -2.335096 | -3.035488 |
| C  | -0.013520 | -2.844799 | -1.585337 |
| C  | 1.132257  | -2.526872 | -2.349439 |
| C  | -0.848302 | -3.910883 | -1.981433 |
| C  | 1.431042  | -3.270817 | -3.501263 |
| H  | 1.802164  | -1.708019 | -2.036596 |
| C  | -0.544085 | -4.647716 | -3.139225 |
| H  | -1.735240 | -4.169779 | -1.382560 |
| C  | 0.592492  | -4.327287 | -3.902178 |
| H  | 2.331373  | -3.020825 | -4.082578 |
| H  | -1.200084 | -5.478958 | -3.444507 |





|   |           |           |           |    |           |           |           |
|---|-----------|-----------|-----------|----|-----------|-----------|-----------|
| C | 0.163575  | -4.539450 | -3.806878 | C  | -0.805612 | -2.049105 | -3.015874 |
| H | 1.545705  | -2.998002 | -4.493982 | H  | -1.282063 | -2.697205 | -0.989580 |
| H | -1.229691 | -5.913211 | -2.845957 | C  | -1.111943 | -1.149834 | -4.035424 |
| H | 0.230116  | -5.130338 | -4.734738 | H  | -2.215948 | 0.664460  | -4.578330 |
| C | 1.199409  | -2.792657 | 1.180083  | H  | -0.171790 | -2.927016 | -3.219886 |
| C | 1.575897  | -2.116749 | 2.360331  | H  | -0.710244 | -1.307453 | -5.050043 |
| C | 1.771404  | -4.050040 | 0.892156  | C  | -4.527653 | -1.736462 | -0.423187 |
| C | 2.506610  | -2.689728 | 3.241946  | C  | -4.743909 | -2.365608 | -1.669784 |
| H | 1.149855  | -1.127222 | 2.583931  | C  | -5.513476 | -1.926100 | 0.576851  |
| C | 2.714938  | -4.613342 | 1.768101  | C  | -5.891099 | -3.146183 | -1.911794 |
| H | 1.494443  | -4.584499 | -0.029149 | H  | -4.001034 | -2.240498 | -2.474967 |
| C | 3.086201  | -3.935624 | 2.943577  | C  | -6.658873 | -2.707615 | 0.350095  |
| H | 2.790100  | -2.144664 | 4.154969  | H  | -5.383541 | -1.434786 | 1.557272  |
| H | 3.166234  | -5.589490 | 1.527052  | C  | -6.852117 | -3.322743 | -0.901535 |
| H | 3.829520  | -4.378251 | 3.625969  | H  | -6.033897 | -3.620438 | -2.897208 |
| C | -2.930746 | 2.966848  | -0.560906 | H  | -7.409126 | -2.834118 | 1.148737  |
| C | -3.255867 | 3.863792  | 0.480679  | H  | -7.750729 | -3.933675 | -1.087919 |
| C | -2.806134 | 3.474336  | -1.878305 | C  | -3.607439 | 0.650988  | 0.499875  |
| C | -3.455093 | 5.229705  | 0.210560  | C  | -4.729147 | 1.342949  | -0.019094 |
| H | -3.352859 | 3.494964  | 1.513670  | C  | -2.853805 | 1.308172  | 1.502297  |
| C | -3.017951 | 4.835386  | -2.147573 | C  | -5.074395 | 2.631914  | 0.427479  |
| H | -2.564507 | 2.787256  | -2.707289 | H  | -5.348978 | 0.855907  | -0.790175 |
| C | -3.339554 | 5.721486  | -1.101237 | C  | -3.206465 | 2.584395  | 1.976123  |
| H | -3.707487 | 5.914265  | 1.036340  | H  | -1.948603 | 0.829124  | 1.912381  |
| H | -2.929169 | 5.207479  | -3.180991 | C  | -4.315604 | 3.256452  | 1.433456  |
| H | -3.500771 | 6.790878  | -1.310216 | H  | -5.947082 | 3.147888  | -0.006423 |
| C | -3.226543 | 0.884858  | 1.430336  | H  | -2.598233 | 3.061025  | 2.760279  |
| C | -4.610287 | 1.019065  | 1.680165  | H  | -4.586369 | 4.263206  | 1.790840  |
| C | -2.371283 | 0.479013  | 2.475878  | C  | -1.960404 | -2.017551 | 1.992785  |
| C | -5.125840 | 0.754626  | 2.958915  | N  | -2.457453 | -1.550916 | 1.048933  |
| H | -5.290060 | 1.323635  | 0.868278  | P  | 0.445431  | 1.999764  | -0.274522 |
| C | -2.890320 | 0.210181  | 3.753579  | C  | 0.581631  | 2.544470  | 1.500452  |
| H | -1.296222 | 0.343245  | 2.264761  | O  | 1.660460  | 0.442367  | 2.119378  |
| C | -4.267081 | 0.348529  | 3.997547  | C  | 2.970404  | 0.401941  | 1.659752  |
| H | -6.207084 | 0.857838  | 3.144756  | C  | 3.976533  | 1.179951  | 2.256427  |
| H | -2.213621 | -0.124170 | 4.555599  | C  | 5.287832  | 1.109921  | 1.761362  |
| H | -4.675811 | 0.129931  | 4.997161  | C  | 5.584057  | 0.271933  | 0.673265  |
| C | 0.538900  | 3.609051  | -1.579662 | C  | 4.574244  | -0.518238 | 0.099763  |
| C | 0.108721  | 4.322138  | -0.272423 | C  | 3.250656  | -0.482398 | 0.589578  |
| H | -0.596325 | 5.123698  | -0.575048 | C  | 0.018699  | 3.759041  | 1.956650  |
| H | 1.095338  | 4.300299  | -2.252682 | C  | -0.038329 | 4.076022  | 3.324577  |
| H | -0.350397 | 3.245774  | -2.131016 | C  | 0.454076  | 3.172157  | 4.280486  |
| H | -0.481652 | 3.602652  | 0.330896  | C  | 1.032387  | 1.964269  | 3.855472  |
| C | 1.260457  | 4.885495  | 0.559094  | C  | 1.110773  | 1.667989  | 2.485627  |
| H | 1.908579  | 4.078978  | 0.961431  | P  | 1.846304  | -1.427940 | -0.161871 |
| H | 1.896148  | 5.582435  | -0.027683 | Pd | -0.078532 | -0.236646 | -0.646070 |
| H | 0.865999  | 5.446072  | 1.431268  | H  | 3.720546  | 1.850977  | 3.089771  |
|   |           |           |           | H  | 6.076306  | 1.726224  | 2.221438  |
|   |           |           |           | H  | 6.605399  | 0.232150  | 0.264088  |
|   |           |           |           | H  | 4.813512  | -1.167322 | -0.755936 |
|   |           |           |           | H  | -0.406543 | 4.460372  | 1.222861  |
|   |           |           |           | H  | -0.487320 | 5.030093  | 3.642522  |
|   |           |           |           | H  | 0.396195  | 3.405634  | 5.355239  |
|   |           |           |           | H  | 1.439302  | 1.236033  | 4.573065  |
|   |           |           |           | C  | 1.652332  | -2.847525 | 1.015817  |
|   |           |           |           | C  | 0.844003  | -3.932924 | 0.593662  |
|   |           |           |           | C  | 2.251922  | -2.905170 | 2.293252  |
|   |           |           |           | C  | 0.658726  | -5.053397 | 1.417893  |

**IM8**

Free Energy = -3206.27743

Energy = -3207.073465

|   |           |           |           |
|---|-----------|-----------|-----------|
| B | -3.207822 | -0.809311 | -0.112435 |
| C | -2.200665 | -0.740454 | -1.402517 |
| C | -2.492771 | 0.147200  | -2.492806 |
| C | -1.317734 | -1.847673 | -1.692384 |
| C | -1.963146 | -0.040954 | -3.770168 |
| H | -3.187945 | 0.983418  | -2.318295 |















|    |           |           |           |   |           |           |           |
|----|-----------|-----------|-----------|---|-----------|-----------|-----------|
| C  | 4.237624  | 1.274808  | 0.448177  | H | 2.208687  | 0.751259  | 3.680425  |
| C  | 3.209471  | 1.946078  | 1.147928  | C | -0.162567 | 3.271801  | 0.051486  |
| C  | 5.566001  | 1.697910  | 0.706834  | C | 0.733743  | 3.361735  | -1.035014 |
| C  | 3.486722  | 2.961589  | 2.082427  | C | -0.037953 | 4.179643  | 1.127114  |
| H  | 2.158754  | 1.678987  | 0.960332  | C | 1.733978  | 4.346463  | -1.049895 |
| C  | 5.857093  | 2.711462  | 1.636945  | H | 0.671165  | 2.637403  | -1.861358 |
| H  | 6.395848  | 1.221487  | 0.156718  | C | 0.960619  | 5.167703  | 1.103962  |
| C  | 4.814143  | 3.346901  | 2.337603  | H | -0.719909 | 4.111374  | 1.989782  |
| H  | 2.652670  | 3.457357  | 2.605335  | C | 1.849339  | 5.251547  | 0.018404  |
| H  | 6.903744  | 3.012199  | 1.813754  | H | 2.445107  | 4.388405  | -1.889302 |
| H  | 5.036545  | 4.143081  | 3.067562  | H | 1.055365  | 5.866220  | 1.950601  |
| C  | 4.345186  | -1.430208 | 0.041660  | H | 2.648717  | 6.008727  | 0.015750  |
| C  | 5.183405  | -1.610155 | 1.165070  | C | -2.950277 | 2.835060  | -0.693918 |
| C  | 3.854019  | -2.607822 | -0.574739 | C | -3.927552 | 2.048310  | -1.343596 |
| C  | 5.522464  | -2.890847 | 1.643998  | C | -3.130813 | 4.232959  | -0.599737 |
| H  | 5.576934  | -0.724354 | 1.690261  | C | -5.076528 | 2.654770  | -1.879356 |
| C  | 4.158078  | -3.892124 | -0.092259 | H | -3.783586 | 0.957856  | -1.436589 |
| H  | 3.218537  | -2.511161 | -1.471972 | C | -4.278223 | 4.834026  | -1.144171 |
| C  | 5.003952  | -4.040478 | 1.023283  | H | -2.369981 | 4.855799  | -0.103461 |
| H  | 6.183782  | -2.990344 | 2.521412  | C | -5.253419 | 4.046091  | -1.781838 |
| H  | 3.741165  | -4.782812 | -0.592166 | H | -5.829656 | 2.029770  | -2.382186 |
| H  | 5.256494  | -5.044193 | 1.403392  | H | -4.408801 | 5.925655  | -1.071813 |
| C  | 4.755130  | 0.321555  | -2.001121 | H | -6.151207 | 4.519619  | -2.210537 |
| C  | 4.272966  | 1.286256  | -2.919607 | C | -0.804428 | -3.319328 | -0.094656 |
| C  | 5.971276  | -0.321109 | -2.327667 | C | -1.796669 | -4.306128 | 0.078734  |
| C  | 4.962070  | 1.593842  | -4.105122 | C | 0.288531  | -3.574396 | -0.956847 |
| H  | 3.329122  | 1.813075  | -2.691717 | C | -1.700369 | -5.530187 | -0.609982 |
| C  | 6.677135  | -0.016757 | -3.508171 | H | -2.651734 | -4.123005 | 0.747411  |
| H  | 6.375094  | -1.084565 | -1.640877 | C | 0.385651  | -4.800380 | -1.629692 |
| C  | 6.173537  | 0.941309  | -4.404932 | H | 1.061557  | -2.803275 | -1.097659 |
| H  | 4.557099  | 2.349037  | -4.800352 | C | -0.613142 | -5.779839 | -1.463449 |
| H  | 7.624208  | -0.536521 | -3.732012 | H | -2.485156 | -6.291551 | -0.476088 |
| H  | 6.720162  | 1.178878  | -5.332608 | H | 1.244780  | -4.989186 | -2.292784 |
| C  | 1.305367  | -0.076545 | -1.178381 | H | -0.541117 | -6.738936 | -2.000446 |
| N  | 2.452810  | -0.008513 | -0.920895 | C | -2.334179 | -1.738997 | 1.820701  |
| P  | -0.920227 | -1.631568 | 0.634335  | C | -2.245543 | -2.558574 | 2.969462  |
| C  | 0.528190  | -1.578677 | 1.786368  | C | -3.503764 | -0.989894 | 1.590235  |
| O  | 0.160500  | 0.798763  | 2.060208  | C | -3.325016 | -2.637414 | 3.862659  |
| C  | -1.049387 | 1.104927  | 2.639544  | H | -1.325173 | -3.130810 | 3.168066  |
| C  | -1.389944 | 0.747344  | 3.953371  | C | -4.580266 | -1.067156 | 2.489674  |
| C  | -2.631600 | 1.155802  | 4.467554  | H | -3.563416 | -0.331751 | 0.710799  |
| C  | -3.515389 | 1.919141  | 3.683553  | C | -4.494825 | -1.892190 | 3.623600  |
| C  | -3.176689 | 2.245264  | 2.359625  | H | -3.249612 | -3.278884 | 4.755151  |
| C  | -1.946907 | 1.825773  | 1.815413  | H | -5.482172 | -0.461726 | 2.309437  |
| C  | 1.326322  | -2.705881 | 2.079053  | H | -5.336910 | -1.946276 | 4.331893  |
| C  | 2.419382  | -2.602706 | 2.953075  | H | -0.864502 | 1.104948  | -2.220643 |
| C  | 2.743023  | -1.368739 | 3.539078  | C | -1.362975 | 0.039334  | -3.455289 |
| C  | 1.963641  | -0.235035 | 3.262850  | C | -1.225291 | -1.305227 | -3.106613 |
| C  | 0.865527  | -0.350177 | 2.400203  | H | -0.221814 | -1.756668 | -3.190646 |
| P  | -1.485521 | 1.981105  | 0.041230  | H | -0.524921 | 0.545321  | -3.963982 |
| Pd | -0.824941 | 0.045492  | -1.039816 | H | -2.363171 | 0.476061  | -3.618539 |
| H  | -0.688787 | 0.149280  | 4.554111  | C | -2.356639 | -2.311968 | -3.043003 |
| H  | -2.909116 | 0.871269  | 5.494497  | H | -2.358262 | -2.828110 | -4.033071 |
| H  | -4.483803 | 2.241622  | 4.095939  | H | -2.103057 | -3.104604 | -2.311558 |
| H  | -3.885646 | 2.805959  | 1.730971  | C | -3.736809 | -1.763499 | -2.761989 |
| H  | 1.104756  | -3.673331 | 1.605009  | C | -4.302173 | -1.891920 | -1.477552 |
| H  | 3.044013  | -3.487241 | 3.143007  | C | -4.485093 | -1.104260 | -3.762875 |
| H  | 3.621515  | -1.279001 | 4.195817  | C | -5.576176 | -1.373443 | -1.191154 |

|   |           |           |           |   |           |           |           |
|---|-----------|-----------|-----------|---|-----------|-----------|-----------|
| H | -3.737847 | -2.423136 | -0.697351 | H | -5.994074 | -1.488376 | -0.178464 |
| C | -5.761118 | -0.585641 | -3.482786 | H | -6.332413 | -0.079948 | -4.277757 |
| H | -4.067433 | -1.010424 | -4.778972 | H | -7.311925 | -0.314458 | -1.973970 |
| C | -6.310483 | -0.717307 | -2.193989 |   |           |           |           |
